Ren: Isomerization sampling

# 1 Photoinduced Isomerization Sampling of Retinal in 2 Bacteriorhodopsin

3

4 Zhong Ren

5

6 Department of Chemistry, University of Illinois at Chicago, Chicago, IL 60607, USA

7 Renz Research, Inc., Westmont, IL 60559, USA

8

9 zren@uic.edu

10 ORCID 0000-0001-7098-3127

11

## 12 **Keywords**

13 charge separation, proton pump, serial crystallography, singular value decomposition,  
14 X-ray free electron laser

15

## 16 **Abstract**

17 Photoisomerization of retinoids inside a confined protein pocket represents a critical  
18 chemical event in many important biological processes from animal vision, non-visual  
19 light effects, to bacterial light sensing and harvesting. Light driven proton pumping in  
20 bacteriorhodopsin entails exquisite electronic and conformational reconfigurations  
21 during its photocycle. However, it has been a major challenge to delineate transient  
22 molecular events preceding and following the photoisomerization of the retinal from  
23 noisy electron density maps when varying populations of intermediates coexist and  
24 evolve as a function of time. Here I report several distinct early photoproducts  
25 deconvoluted from the recently observed mixtures in time-resolved serial  
26 crystallography. This deconvolution substantially improves the quality of the electron  
27 density maps hence demonstrates that the all-*trans* retinal undergoes extensive  
28 isomerization sampling before it proceeds to the productive 13-*cis* configuration. Upon  
29 light absorption, the chromophore attempts to perform *trans*-to-*cis* isomerization at  
30 every double bond coupled with the stalled *anti*-to-*syn* rotations at multiple single  
31 bonds along its polyene chain. Such isomerization sampling pushes all seven  
32 transmembrane helices to bend outward, resulting in a transient expansion of the  
33 retinal binding pocket, and later, a contraction due to recoiling. These ultrafast

## Ren: Isomerization sampling

34 responses observed at the atomic resolution support that the productive photoreaction  
35 in bacteriorhodopsin is initiated by light-induced charge separation in the prosthetic  
36 chromophore yet governed by stereoselectivity of its protein pocket. The method of a  
37 numerical resolution of concurrent events from mixed observations is also generally  
38 applicable.

39

### 40 **Introduction**

41 Bacteriorhodopsin (bR) pumps protons outward from the cytoplasm (CP) against the  
42 concentration gradient via photoisomerization of its retinal chromophore. The trimeric  
43 bR on the native purple membrane shares the seven transmembrane helical fold and the  
44 same prosthetic group (Fig. S1) with large families of microbial and animal rhodopsins  
45 (Ernst et al., 2014; Kandori, 2015). An all-*trans* retinal in the resting state is covalently  
46 linked to Lys216 of helix G through a Schiff base (SB), of which the double bond C<sub>15</sub>=N<sub>ζ</sub>  
47 is also in *trans*. Upon absorption of a visible photon, the all-*trans* retinal in bR  
48 isomerizes efficiently and selectively to adopt the 13-*cis* configuration (Govindjee et al.,  
49 1990). In contrast, an all-*trans* free retinal in organic solvents could isomerize about  
50 various double bonds, but with poor quantum yields (Freedman and Becker, 1986;  
51 Koyama et al., 1991).

52

53 A broad consensus is that the isomerization event takes place around 450-500 fs  
54 during the transition from a blue-shifted species I to form a red-shifted intermediate J  
55 (Herbst, 2002; Mathies et al., 1988). Various molecular events prior to the isomerization  
56 have also been detected. Vibrational spectroscopy showed a variety of possible  
57 motions, such as torsions about C<sub>13</sub>=C<sub>14</sub> and C<sub>15</sub>=N<sub>ζ</sub>, H-out-of-plane wagging at C<sub>14</sub>, and  
58 even protein responses (Diller et al., 1995; Kobayashi et al., 2001). Nevertheless, the  
59 species I or a collection of species detected before 30 fs remain in a good *trans*  
60 configuration about C<sub>13</sub>=C<sub>14</sub> instead of a near 90° configuration (Zhong et al., 1996).  
61 Recently, deep-UV stimulated Raman spectroscopy revealed strong signals of Trp and  
62 Tyr motions in the protein throughout the I and J intermediates (Tahara et al., 2019).  
63 Despite extensive studies, fundamental questions on the photoisomerization of retinal  
64 remain unanswered at the atomic resolution. What is the quantum mechanical force  
65 that causes the all-*trans* retinal to isomerize specifically to 13-*cis* after absorbing a  
66 photon? Why not isomerize elsewhere in bR? How is the quantum yield of this specific  
67 isomerization enhanced by the protein compared to those of free retinal in solution?

## Ren: Isomerization sampling

68 Does any isomerization sampling occur? This work addresses these questions by  
69 solving a series of structures of the early intermediates based on the electron density  
70 maps unscrambled from the published serial crystallography datasets using singular  
71 value decomposition (SVD). These structures of “pure” photoproducts at atomic  
72 resolution reveal widespread conformational changes in all seven helices prior to the  
73 all-*trans* to 13-*cis* isomerization and after its completion, suggesting that isomerization  
74 sampling takes place in bR, where rapid photoisomerizations and single bond rotations  
75 are attempted everywhere along the polyene chain of the retinal before the only  
76 successful one flips the SB at ~500 fs.

77  
78 Several international consortiums carried out large operations of serial  
79 crystallography at free electron lasers (XFELs). It is now possible to capture transient  
80 structural species at room temperature in the bR photocycle as short-lived as fs  
81 (Brändén and Neutze, 2021). Compared to cryo-trapping, authentic structural signals  
82 from these XFEL data are expected to be greater in both amplitude and scope.  
83 However, the signals reported so far do not appear to surpass those obtained by cryo-  
84 trapping methods, suggesting much needed improvements in experimental protocols  
85 and data analysis methods. Two major sources of data are used in this study (Table S1).  
86 Nogly et al. captured retinal isomerization to 13-*cis* by the time of 10 ps and attributed  
87 the specificity to the H-bond breaking between the SB and a water (Nogly et al., 2018).  
88 Kovacs et al. contributed datasets at many short time delays (Kovacs et al., 2019). Those  
89 sub-ps datasets demonstrate oscillatory signals at frequencies around 100 cm<sup>-1</sup>. The  
90 essence of this work is a numerical resolution of structural heterogeneity, a common  
91 difficulty often encountered in cryo trapping and time-resolved serial crystallography.  
92 To what extent a specific structural species can be enriched in crystals depends on the  
93 reaction kinetics governed by many experimental parameters including but not limited  
94 to the fluence, wavelength, and temperature of the light illumination. While it is  
95 possible to reach higher fractional concentrations at specific time points for more stable  
96 species such as K or M due to the ratio between the rates going into and exiting from  
97 that species, transient species such as I and J are often poorly populated. If such  
98 structural heterogeneity is not resolved, it is very difficult, if not impossible, to interpret  
99 the electron density maps and to refine the intermediate structures (Ren et al., 2013).  
100 An assumption in nearly all previous studies has been that each dataset, at a cryo  
101 temperature or at a time delay, is derived from a mixture of a single photoinduced

## Ren: Isomerization sampling

102 species and the ground state. Therefore, the difference map reveals a pure intermediate  
103 structure. This assumption is far from the reality thus often leads to misinterpretation  
104 of the observed electron density maps. This work is yet another case study to  
105 demonstrate the application of our analytical protocol based on SVD (Methods) that  
106 makes no assumption on how many excited intermediates that contribute to the  
107 captured signals at each time point (Ren, 2019; Ren et al., 2013; Yang et al., 2011). More  
108 importantly, this work showcases that our resolution of structural heterogeneity enables  
109 new mechanistic insights into the highly dynamic chemical or biochemical processes.

110

### 111 **Results and Discussion**

112 A total of 24 datasets and 18 time points up to 10 ps are analyzed in this study (Table  
113 S1). Difference Fourier maps at different time points and with respect to their  
114 corresponding dark datasets are calculated according to the protocols previously  
115 described (Methods). A collection of 126 difference maps at short delays  $\leq 10$  ps are  
116 subjected to singular value decomposition (SVD; Methods) followed by a numerical  
117 deconvolution using the previously established Ren rotation in a multi-dimensional  
118 Euclidean space (Ren, 2016, 2019). Such resolution of electron density changes from  
119 mixed photoexcited species in the time-resolved datasets results in four distinct  
120 intermediate structures in the early photocycle, which are then refined against the  
121 reconstituted structure factor amplitudes (Table S2; Methods).

122

#### 123 *Low frequency oscillations observed upon photoexcitation*

124 Ten out of 17 major components derived from the sub-ps delays of Kovacs et al. (Fig.  
125 S2) describe five two-dimensional oscillatory behaviors at frequencies ranging from 60  
126 to 400  $\text{cm}^{-1}$  (Fig. S3). Compared to a bond stretching frequency commonly observed in  
127 vibrational spectroscopy, these oscillations are at much lower frequencies. The lowest  
128 frequency is  $61 \pm 2 \text{ cm}^{-1}$ , that is, a period of  $550 \pm 20$  fs (Fig. S3a), which matches exactly  
129 the oscillation detected in transient absorption changes in visual rhodopsin (Wang et al.,  
130 1994). Although these ten components follow the oscillatory time dependencies, they  
131 do not show any association with the chromophore or the secondary structure of the  
132 protein (Fig. S4). Similar oscillatory components were also present in the XFEL datasets  
133 of MbCO (Ren, 2019). Therefore, the same conclusion stands that these low frequency  
134 vibrations induced by short laser pulses often detected by ultrafast spectroscopy are the  
135 intrinsic property of a solvated protein molecule, here specifically bacteriorhodopsin



Ren: Isomerization sampling

136 (bR) (Johnson et al., 2014; Liebel et al., 2014). Interestingly, the isomerization sampling  
137 and productive photoisomerization observed in this study occur within the first  
138 oscillatory period at the lowest frequency. While such coincidence begs the question  
139 whether the protein oscillation is required for isomerization (see below), direct evidence  
140 is lacking in these XFEL data to support any functional relevance of these oscillatory  
141 signals.

142

143 *Intermediates I', I, and expansion of retinal binding pocket*

144 In contrast to the oscillating signals, three components  $\mathbf{U}_{10}$ ,  $\mathbf{U}_{14}$ , and  $\mathbf{U}_{17}$  reveal strong  
145 light-induced structural signals in terms of both extensiveness and quality (Figs. 1ab  
146 and S5). These signals originate exclusively from a few time points of Nogly et al., too  
147 few to fit the time dependency with exponentials. Instead, a spline fitting through these  
148 time points gives rise to the estimated coefficients  $c_{10}$ ,  $c_{14}$ , and  $c_{17}$  in the linear  
149 combination of  $c_{10}\mathbf{U}_{10} + c_{14}\mathbf{U}_{14} + c_{17}\mathbf{U}_{17}$  for reconstructing the electron density maps of the  
150 states I, J, and their respective precursors I', J' (Fig. 2a). A reconstituted difference map  
151 of I' - bR (Fig. 1c) is located on the spline trajectory from the origin, that is, bR at the  
152 time point of 0-, to the first time point of 49-406 fs (PDB entry 6g7i). This state is  
153 denoted I' as a precursor leading to the I state judged by the time point at ~30 fs.  
154 However, this is not to say that a single species I' exists around 30 fs. Quite the  
155 opposite, the population of the time-independent conformational species I' rises and  
156 falls and peaks around 30 fs, while many other species during isomerization sampling  
157 coexist with I' at the same time (see below). The reconstituted difference map is used to  
158 calculate a set of structure factor amplitudes that would produce this difference map of  
159 I' - bR (Methods). And the structure of I' is refined against this reconstituted dataset  
160 (beige; Figs. 1cd and S6). The same protocol is used to refine the structure of I state  
161 (purple; Fig. S7) with a reconstituted difference map I - bR (Figs. 1a, 2ab, 3a, and S5).  
162 This SVD-dependent refinement strategy extends the commonly used method based on  
163 an extrapolated map to another level. This newly developed method is able to refine a  
164 structure against any linear combination of signal components while eliminating noise  
165 and systematic error components, and components identified as other intermediate  
166 species mixed in the data. Therefore, this method enables the refinement of an  
167 unscrambled, hence pure, structural species (Methods).

168

Ren: Isomerization sampling

169 The all-*trans* retinal chromophore in the ground state of bR is largely flat except the  
170 last atom C<sub>15</sub> (Fig. 2c 2<sup>nd</sup> panel). In contrast, the side chain of Lys216 is highly twisted  
171 forming two near-90° single bonds (Fig. 2c 4<sup>th</sup> panel), which results in a corner at C<sub>ε</sub> that  
172 deviates dramatically from the plane of the all-*trans* retinal (Fig. 2c 2<sup>nd</sup> panel). The  
173 refined geometry of the retinal in I' retains a near perfect all-*trans* configuration,  
174 including the Schiff base (SB) double bond C<sub>15</sub>=N<sub>ζ</sub>, while various single bonds along the  
175 polyene chain deviate from the standard *anti* conformation significantly (Fig. 2c 4<sup>th</sup>  
176 panel). The torsional deviations from *anti* are in a descending order from the β-ionone  
177 ring to the SB. These torsional changes result in an S-shaped retinal shortened by ~4%  
178 (Fig. 2c 3<sup>rd</sup> panel). The distal segment C<sub>6</sub>-C<sub>12</sub> moves inboard up to 0.9 Å and the  
179 proximal segment C<sub>13</sub>-C<sub>ε</sub>, including the SB, moves outboard up to 1.6 Å (Fig. 2c 1<sup>st</sup> and  
180 2<sup>nd</sup> panels; see Fig. S1 for orientations in bR). This creased retinal observed here at  
181 around 30 fs (Fig. 1d) is attributed to the direct consequence of a compression under an  
182 attraction force between the β-ionone ring and the SB (see below).

183  
184 The refined structure of the I state (Fig. S7) shows that the retinal remains in near  
185 perfect all-*trans*, including the SB, and as creased as its precursor I' (Fig. 3c). The  
186 torsional deviations from *anti* single bonds become even more severe compared to the I'  
187 state and remain in a descending order from the β-ionone ring to the SB (Fig. 2c 4<sup>th</sup>  
188 panel). The major difference from its precursor is that the single bond N<sub>ζ</sub>-C<sub>ε</sub> now  
189 adopts a perfect *syn* conformation (Figs. 2c 4<sup>th</sup> panel and 3c), and the anchor Lys216 has  
190 largely returned to its resting conformation. Such a lack of substantial change between  
191 the ground state and the intermediate I was previously noted by a comparison of a  
192 chemically locked C<sub>13</sub>=C<sub>14</sub> with the native retinal (Zhong et al., 1996).

193  
194 Remarkably, the major component **U**<sub>10</sub> reconstituted into the difference map of I – bR  
195 contains widespread signal associated with all seven helices (Fig. 2b). The reconstituted  
196 map clearly shows collective outward motions from the center (Fig. 3a) suggesting an  
197 expansion of the retinal binding pocket at hundreds of fs, which is confirmed by the  
198 refined structure of the I state (Fig. 3d top panel). For example, the distance between  
199 the C<sub>α</sub> atoms increases by 0.8 Å between Arg82 and Phe208 and by 0.7 Å between Tyr83  
200 and Trp182. It is noteworthy that similar protein signals are present in the raw  
201 difference map calculated from the time point of 457-646 fs from Nogly et al. (6g7j) prior  
202 to an SVD analysis (Fig. S8).

Ren: Isomerization sampling

203  
204 Transient bleaching at near UV of 265-280 nm was observed before 200 fs and  
205 attributed to structural changes in the retinal skeleton and the surrounding Trp residues  
206 (Schenkl et al., 2005). Recent deep-UV stimulated Raman spectroscopy also  
207 demonstrated that motions of Trp and Tyr residues start to emerge at 200 fs and remain  
208 steady until the isomerization is over at 30 ps (Tahara et al., 2019). Here the refined  
209 structure of the I state with displaced helices and an expanded retinal binding pocket  
210 offers an explanation for the stimulated Raman gain change at hundreds of fs.  
211 However, it is unclear why and how such extensive protein responses take place even  
212 before the retinal isomerization. According to the broadly accepted concept of  
213 proteinquake, initial motions are generated at the epicenter where the chromophore  
214 absorbs a photon and then propagated throughout the protein matrix (Ansari et al.,  
215 1985). It is plausible that these ultrafast protein responses are the direct consequence of  
216 isomerization sampling in a confined protein pocket. It was observed in organic  
217 solvents using high-pressure liquid chromatography (HPLC) that all-*trans* retinal could  
218 isomerize at various double bonds along the polyene chain to adopt 9-, 11-, and 13-*cis*  
219 configurations, but with rather poor quantum yields (Freedman and Becker, 1986;  
220 Koyama et al., 1991). This intrinsic property of the all-*trans* retinal would behave the  
221 same even when it is incorporated in the protein except that the protein matrix herds  
222 the chromophores on the right track of the productive photocycle and keeps the  
223 concentrations of the attempted byproducts low. These byproduct conformations of the  
224 retinal during isomerization sampling are too numerous and too minor to be observed  
225 experimentally. Nevertheless, they cause a common effect, an expansion of its binding  
226 pocket, since the all-*trans* retinal in the resting state is tightly boxed by massive side  
227 chains all around (Fig. 3e). Any attempt to isomerize would push against this box one  
228 way or another. For instance, triple attempts to isomerize simultaneously at 11, 13, and  
229 15 positions were suggested by a quantum mechanics/molecular mechanics simulation  
230 (Altoè et al., 2010). When the retinal binding pocket is altered in mutants, the quantum  
231 yield of each isomerization byproduct is expected to increase resulting in an impaired  
232 productive pathway (see below).

233  
234 *Intermediates J', J and productive isomerization of retinal*

235 The time point of 10 ps of Nogly et al. (6g7k) differs from the previous time point of  
236 457-646 fs (6g7j) by negating the component of  $\mathbf{U}_{10}$  (Fig. 2ab), which leads to a

## Ren: Isomerization sampling

237 restoration of the normal retinal binding pocket in J' from an expanded one in the I state  
238 followed by a contraction in J (Fig. 3d bottom panel). Two time-independent structures  
239 of J' (green; Fig. S9) and J (gray; Fig. S10) are refined based on the respective  
240 reconstituted difference maps with the same protocol (Methods). Their populations  
241 peak at the approximate time of ~700 fs and ~20 ps, respectively. The observed  
242 contraction of the retinal binding pocket is likely due to an elastic recoiling of the seven  
243 helical bundle following its transient expansion caused by the isomerization sampling.

244

245 The creased retinal persists in both the J' and J structures (Fig. 2c 2<sup>nd</sup> panel and Fig.  
246 3c). The difference map of J' – bR clearly shows the 13-*cis* configuration (Fig. 3b).  
247 Indeed, near perfect 13-*cis* is successfully refined in both structures (Fig. 2c 4<sup>th</sup> panel).  
248 While the SB double bond C<sub>15</sub>=N<sub>ζ</sub> is momentarily distorted from the *trans* configuration  
249 in J' with a torsion angle of 133°, a perfect *trans* configuration at C<sub>15</sub>=N<sub>ζ</sub> is promptly  
250 restored in J (Fig. 2c 4<sup>th</sup> panel). The refined structures of this series of early  
251 intermediates show that the SB N<sub>ζ</sub> is rotating clockwise in the entire process of the  
252 isomerization of I' → I → J' → J, if the retinal is viewed from the proximal to distal  
253 direction (Fig. 2c). It seems that the isomerization starts in an expanded retinal binding  
254 pocket and finishes in a tighter one. Whether the pocket expansion and contraction are  
255 required for the productive isomerization and what role the low frequency oscillations  
256 play in isomerization will need more time points at short delays to further isolate the  
257 molecular events temporally.

258

### 259 *Coulomb attraction as driving force of isomerization sampling*

260 The fundamental questions remain: What is the driving force that causes the all-*trans*  
261 retinal to isomerize after a photon absorption, at several double bonds if not restrained  
262 but exclusively at C<sub>13</sub>=C<sub>14</sub> in bR? How does the protein environment enhance the  
263 quantum yield of the isomerization to 13-*cis*? Here I hypothesize that a Coulomb  
264 attraction between the β-ionone ring and the SB at the Frank-Condon point, 0+ time  
265 point, provides the initial driving force upon a photon absorption. The electric field  
266 spectral measurements (Mathies and Stryer, 1976) and the quantum mechanics  
267 simulation (Nogly et al., 2018) suggested that a charge separation occurs along the  
268 polyene chain at the excited state of bR. Such a dipole moment was also detected  
269 through a transient bleaching signal at near UV region (Schenkl et al., 2005). It can be  
270 shown that a plausible charge separation of ±0.1e between the β-ionone ring and the SB

Ren: Isomerization sampling

271 would cause an attraction force  $> 1$  pN. If calibrated with the measured range of dipole  
272 moment of 10-16 D (Mathies and Stryer, 1976), the charge separation could reach the  
273 level of  $\pm 0.16e$  to  $\pm 0.26e$ , giving rise to an attraction force of 3.5-9 pN between the  $\beta$ -  
274 ionone ring and the SB. This attraction force is evidently sufficient to crease the flat all-  
275 *trans* retinal into an S-shape and to compress it slightly within tens of fs as observed in  
276 I' and I states (Figs. 1d, 2c 2<sup>nd</sup> and 3<sup>rd</sup> panels, and 3c). In the meanwhile, this very  
277 attraction force also triggers simultaneous attempts of double bond isomerizations and  
278 single bond rotations along the polyene chain that cause the expansion of the retinal  
279 binding pocket as observed at hundreds of fs. Following the only successful  
280 isomerization at C<sub>13</sub>=C<sub>14</sub>, the chromophore segment from C<sub>15</sub> to C<sub>8</sub> is attracted to the  $\beta$ -  
281 ionone ring; and these two parts become significantly closer (Fig. 2c 3<sup>rd</sup> panel). None of  
282 the single bond rotations can complete under the restraints of the protein. Especially,  
283 the segment closer to the midpoint of the retinal is more confined due to the steric  
284 hinderance of Thr90 and Tyr185 from the inboard and outboard sides, respectively (Fig.  
285 3e). Therefore, the single bonds deviate from *anti* less and less towards the midpoint  
286 (Fig. 2c 4<sup>th</sup> panel). The effect of charge separation seems eased gradually as the reaction  
287 proceeds beyond the J state as indicated by the slow restoration of the *anti* conformation  
288 (Fig. 2c 4<sup>th</sup> panel).

289  
290 Apparently, the same charge separation and the attraction force upon photon  
291 absorption also take place in a solution sample of free retinal. Compared to the retinal  
292 embedded in protein, photoisomerization in solution is nonspecific, resulting in a range  
293 of byproducts, since an isomerization at any position would bring the SB significantly  
294 closer to the  $\beta$ -ionone ring. It is understandable that each of the byproducts could only  
295 achieve a poor quantum yield (Freedman and Becker, 1986; Koyama et al., 1991) as  
296 rotations at multiple single bonds driven by the same attraction force and achieving a  
297 similar folding of the polyene chain would further sidetrack the double bond  
298 isomerizations thus diminishing their quantum yields. However, these byproducts due  
299 to single bond rotations are short-lived beyond detection by HPLC as they  
300 spontaneously revert back in solution. The protein environment in bR plays a major  
301 role in enhancing the quantum yield of the isomerization to 13-*cis* by shutting down all  
302 other reaction pathways triggered by the charge separation. This is further elucidated  
303 by the mutant functions below.

304



Ren: Isomerization sampling

305 *Isomerization byproducts permitted by mutant protein environments*

306 The structure of a double mutant T90A/D115A (3cod) showed little difference from the  
307 wildtype (Joh et al., 2008) while the single mutants T90V and T90A retain < 70% and <  
308 20% of the proton pumping activity, respectively (Marti et al., 1991; Perálvarez et al.,  
309 2001). These observations illustrate that some nonproductive pathways of the  
310 isomerization sampling succeed more in the altered retinal binding pocket. In the  
311 wildtype structure, Thr90 in helix C points towards the C<sub>11</sub>=C<sub>12</sub>-C<sub>13</sub>-C<sub>20</sub> segment of the  
312 retinal from the inboard with its C<sub>γ</sub> atom 3.7 Å from the retinal plane. Given the van  
313 der Waals radius  $r_c$  of 1.7 Å, only 0.3 Å is spared for the H atoms of the C<sub>γ</sub> methyl group  
314 thereby effectively shutting down the nonproductive pathways of the isomerization  
315 sampling. Any motion of the retinal would have to push helix C toward inboard  
316 causing an expansion of its binding pocket. Missing this close contact in T90A increases  
317 the room to 1.9 Å for isomerization byproducts, which would greatly reduce the  
318 quantum yield of the 13-*cis* productive isomerization thus retain < 20% of the activity.

319

320 In addition to 13-*cis*, the retinal in the light adapted T90V mutant showed 9- and 11-  
321 *cis* configurations at the occupancies of 3% and 18%, respectively, while these  
322 configurations were not detected in light adapted wildtype (Marti et al., 1991). Then  
323 why would a Val residue at this position with an equivalent C<sub>γ</sub> atom permit the  
324 formation of some isomerization byproducts? In wildtype bR, the side chain of Thr90  
325 engages two strong H-bonds Trp86O-Thr90O<sub>γ</sub>-D115O<sub>δ</sub> so that its C<sub>γ</sub> methyl group is  
326 aligned toward the retinal. Without these H-bonds in T90V, the isopropyl group of  
327 Val90 is free to adopt other rotameric positions so that neither of the C<sub>γ</sub> methyl groups  
328 has to point directly to the retinal, which increases the available room for the formation  
329 of some isomerization byproducts. Compared to the light adapted state, these  
330 isomerization byproducts could reach even higher percentages during active  
331 photocycles thus reduce the proton pumping activity below 70%.

332

333 From the outboard, the side chain of Tyr185 in helix F is nearly parallel to the retinal  
334 plane with a distance of 3.5 Å. This close contact of a flat area from C<sub>8</sub> to C<sub>14</sub> of the  
335 retinal prevents any significant motion of the retinal toward the outboard. Even slight  
336 motions would push helix F away as observed here in the expansion of the retinal  
337 binding pocket. The mutant Y185F largely retains the flat contact so that its proton  
338 pumping activity does not reduce much (Hackett et al., 1987; Mogi et al., 1987).



## Ren: Isomerization sampling

339 However, it is predictable that various single mutants at this position with smaller and  
340 smaller side chains would promote more and more isomerization byproducts and  
341 eventually shut down proton pumping.

342  
343 Two massive side chains of Trp86 and 182 from the EC and CP sides respectively do  
344 not seem to play a significant role in suppressing byproduct formation as shown by the  
345 mutant W182F that retains the most of the wildtype activity (Hackett et al., 1987), since  
346 the motions involved in isomerization sampling are oriented more laterally. The  
347 transient expansion and contraction of the retinal binding pocket (Fig. 3d) indicate that  
348 the tight box surrounds the mid-segment of the retinal (Fig. 3e) is not completely rigid.  
349 Rather, its plasticity must carry sufficient strength to prevent isomerization byproducts.  
350 Presumably, this strength originates from the mechanical property of the helical bundle.

351  
352 In summary, this work reveals the transient structural responses to many  
353 unsuccessful attempts of double bond isomerization and single bond rotation by a  
354 numerical resolution from the concurrent pathways, which are otherwise difficult to  
355 observe. These findings underscore an important implication, that is, a nonspecific  
356 Coulomb attraction provides the same driving force for the isomerization sampling  
357 with and without a protein matrix. A productive isomerization at a specific double  
358 bond is guided by the incorporation of the chromophore in a specific protein  
359 environment. The productive pathway is selected from numerous possibilities via  
360 stereochemical hinderance. Nevertheless, this nonspecific Coulomb attraction force  
361 may not be directly applicable to the photoisomerization of retinal from 11-*cis* to all-  
362 *trans* in the activation of visual rhodopsins. The key difference is bR as an energy  
363 convertor versus a visual rhodopsin as a quantum detector (Lewis, 1978).

## 364 365 **Acknowledgements**

366 This work is supported in part by the grant R01EY024363 from National Institutes of  
367 Health. The following database and software are used in this work: CCP4 ([ccp4.ac.uk](http://ccp4.ac.uk)),  
368 Coot ([www2.mrc-lmb.cam.ac.uk/Personal/pemsley/coot](http://www2.mrc-lmb.cam.ac.uk/Personal/pemsley/coot)), dynamix™ (Renz Research,  
369 Inc.), gnuplot ([gnuplot.info](http://gnuplot.info)), PDB ([rcsb.org](http://rcsb.org)), PHENIX ([phenix-online.org](http://phenix-online.org)), PyMOL  
370 ([pymol.org](http://pymol.org)), Python ([python.org](http://python.org)), and SciPy ([scipy.org](http://scipy.org)).

371

Ren: Isomerization sampling

372 **Competing interests**

373 ZR is the founder of Renz Research, Inc. that currently holds the copyright of the  
374 computer software dynamiX™.

375

376 **References**

- 377 Adams, P.D., Afonine, P.V., Bunkóczi, G., Chen, V.B., Davis, I.W., Echols, N., Headd, J.J., Hung, L.-W.,  
378 Kapral, G.J., Grosse-Kunstleve, R.W., et al. (2010). PHENIX: a comprehensive Python-based system for  
379 macromolecular structure solution. *Acta Crystallogr. D Biol. Crystallogr.* *D66*, 213–221.
- 380 Altoè, P., Cembran, A., Olivucci, M., and Garavelli, M. (2010). Aborted double bicycle-pedal  
381 isomerization with hydrogen bond breaking is the primary event of bacteriorhodopsin proton pumping.  
382 *Proc. Natl. Acad. Sci.* *107*, 20172–20177.
- 383 Ansari, A., Berendzen, J., Bowne, S.F., Frauenfelder, H., Iben, I.E., Sauke, T.B., Shyamsunder, E., and  
384 Young, R.D. (1985). Protein states and proteinquakes. *Proc. Natl. Acad. Sci.* *82*, 5000–5004.
- 385 Brändén, G., and Neutze, R. (2021). Advances and challenges in time-resolved macromolecular  
386 crystallography. *Science* *373*, eaba0954.
- 387 Chandonia, J.-M., and Brenner, S.E. (2006). The impact of structural genomics: expectations and  
388 outcomes. *Science* *311*, 347–351.
- 389 Diller, R., Maiti, S., Walker, G.C., Cowen, B.R., Pippenger, R., Bogomolni, R.A., and Hochstrasser, R.M.  
390 (1995). Femtosecond time-resolved infrared laser study of the J–K transition of bacteriorhodopsin. *Chem.*  
391 *Phys. Lett.* *241*, 109–115.
- 392 Ernst, O.P., Lodowski, D.T., Elstner, M., Hegemann, P., Brown, L.S., and Kandori, H. (2014). Microbial  
393 and animal rhodopsins: Structures, functions, and molecular mechanisms. *Chem. Rev.* *114*, 126–163.
- 394 Freedman, K.A., and Becker, R.S. (1986). Comparative investigation of the photoisomerization of the  
395 protonated and unprotonated n-butylamine Schiff bases of 9-cis-, 11-cis-, 13-cis-, and all-trans-retinals. *J.*  
396 *Am. Chem. Soc.* *108*, 1245–1251.
- 397 Glynn, C., and Rodriguez, J.A. (2019). Data-driven challenges and opportunities in crystallography.  
398 *Emerg. Top. Life Sci.* ETL520180177.
- 399 Govindjee, R., Balashov, S.P., and Ebrey, T.G. (1990). Quantum efficiency of the photochemical cycle of  
400 bacteriorhodopsin. *Biophys. J.* *58*, 597–608.
- 401 Hackett, N.R., Stern, L.J., Chao, B.H., Kronis, K.A., and Khorana, H.G. (1987). Structure-function studies  
402 on bacteriorhodopsin. V. Effects of amino acid substitutions in the putative helix F. *J. Biol. Chem.* *262*,  
403 9277–9284.
- 404 Henry, E.R., and Hofrichter, J. (1992). Singular value decomposition: Application to analysis of  
405 experimental data. In *Numerical Computer Methods*, (Academic Press), pp. 129–192.
- 406 Herbst, J. (2002). Femtosecond infrared spectroscopy of bacteriorhodopsin chromophore isomerization.  
407 *Science* *297*, 822–825.
- 408 Joh, N.H., Min, A., Faham, S., Whitelegge, J.P., Yang, D., Woods, V.L., and Bowie, J.U. (2008). Modest  
409 stabilization by most hydrogen-bonded side-chain interactions in membrane proteins. *Nature* *453*, 1266–  
410 1270.

Ren: Isomerization sampling

- 411 Johnson, P.J.M., Halpin, A., Morizumi, T., S. Brown, L., I. Prokhorenko, V., P. Ernst, O., and Miller, R.J.D.  
412 (2014). The photocycle and ultrafast vibrational dynamics of bacteriorhodopsin in lipid nanodiscs. *Phys.*  
413 *Chem. Chem. Phys.* *16*, 21310–21320.
- 414 Jung, Y.O., Lee, J.H., Kim, J., Schmidt, M., Moffat, K., Šrajcar, V., and Ihee, H. (2013). Volume-conserving  
415 trans–cis isomerization pathways in photoactive yellow protein visualized by picosecond X-ray  
416 crystallography. *Nat. Chem.* *5*, 212–220.
- 417 Kandori, H. (2015). Ion-pumping microbial rhodopsins. *Front. Mol. Biosci.* *2*.
- 418 Kobayashi, T., Saito, T., and Ohtani, H. (2001). Real-time spectroscopy of transition states in  
419 bacteriorhodopsin during retinal isomerization. *Nature* *414*, 531–534.
- 420 Kovacs, G.N., Colletier, J.-P., Grünbein, M.L., Yang, Y., Stensitzki, T., Batyuk, A., Carbajo, S., Doak, R.B.,  
421 Ehrenberg, D., Foucar, L., et al. (2019). Three-dimensional view of ultrafast dynamics in photoexcited  
422 bacteriorhodopsin. *Nat. Commun.* *10*, 3177.
- 423 Koyama, Y., Kubo, K., Komori, M., Yasuda, H., and Mukai, Y. (1991). Effect of protonation on the  
424 isomerization properties of n-butylamine Schiff base of isomeric retinal as revealed by direct HPLC  
425 analyses: Selection of isomerization pathways by retinal proteins. *Photochem. Photobiol.* *54*, 433–443.
- 426 Lanyi, J.K., and Schobert, B. (2007). Structural changes in the L photointermediate of bacteriorhodopsin. *J.*  
427 *Mol. Biol.* *365*, 1379–1392.
- 428 Lewis, A. (1978). The molecular mechanism of excitation in visual transduction and bacteriorhodopsin.  
429 *Proc. Natl. Acad. Sci.* *75*, 549–553.
- 430 Liebel, M., Schnedermann, C., Bassolino, G., Taylor, G., Watts, A., and Kukura, P. (2014). Direct  
431 observation of the coherent nuclear response after the absorption of a photon. *Phys. Rev. Lett.* *112*,  
432 238301.
- 433 Liebschner, D., Afonine, P.V., Baker, M.L., Bunkóczi, G., Chen, V.B., Croll, T.I., Hintze, B., Hung, L.-W.,  
434 Jain, S., McCoy, A.J., et al. (2019). Macromolecular structure determination using X-rays, neutrons and  
435 electrons: recent developments in Phenix. *Acta Crystallogr. Sect. Struct. Biol.* *75*, 861–877.
- 436 Marti, T., Otto, H., Mogi, T., Rösselet, S.J., Heyn, M.P., and Khorana, H.G. (1991). Bacteriorhodopsin  
437 mutants containing single substitutions of serine or threonine residues are all active in proton  
438 translocation. *J. Biol. Chem.* *266*, 6919–6927.
- 439 Mathies, R., and Stryer, L. (1976). Retinal has a highly dipolar vertically excited singlet state: implications  
440 for vision. *Proc. Natl. Acad. Sci.* *73*, 2169–2173.
- 441 Mathies, R., Brito Cruz, C., Pollard, W., and Shank, C. (1988). Direct observation of the femtosecond  
442 excited-state cis-trans isomerization in bacteriorhodopsin. *Science* *240*, 777–779.
- 443 Mogi, T., Stern, L.J., Hackett, N.R., and Khorana, H.G. (1987). Bacteriorhodopsin mutants containing  
444 single tyrosine to phenylalanine substitutions are all active in proton translocation. *Proc. Natl. Acad. Sci.*  
445 *84*, 5595–5599.
- 446 Nogly, P., Weinert, T., James, D., Carbajo, S., Ozerov, D., Furrer, A., Gashi, D., Borin, V., Skopintsev, P.,  
447 Jaeger, K., et al. (2018). Retinal isomerization in bacteriorhodopsin captured by a femtosecond x-ray laser.  
448 *Science* *361*, eaat0094.
- 449 Perálvarez, A., Barnadas, R., Sabés, M., Querol, E., and Padrós, E. (2001). Thr90 is a key residue of the  
450 bacteriorhodopsin proton pumping mechanism. *FEBS Lett.* *508*, 399–402.
- 451 Ren, Z. (2013a). Reaction trajectory revealed by a joint analysis of Protein Data Bank. *PLoS ONE* *8*, e77141.

Ren: Isomerization sampling

- 452 Ren, Z. (2013b). Reverse engineering the cooperative machinery of human hemoglobin. *PLoS ONE* 8,  
453 e77363.
- 454 Ren, Z. (2016). Molecular events during translocation and proofreading extracted from 200 static  
455 structures of DNA polymerase. *Nucleic Acids Res.* 6, 1–13.
- 456 Ren, Z. (2019). Ultrafast structural changes decomposed from serial crystallographic data. *J. Phys. Chem.*  
457 *Lett.* 10, 7148–7163.
- 458 Ren, Z., Perman, B., Srajer, V., Teng, T.-Y., Praderyand, C., Bourgeois, D., Schotte, F., Ursby, T., Kort, R.,  
459 Wulff, M., et al. (2001). A molecular movie at 1.8 Å resolution displays the photocycle of photoactive  
460 yellow protein, a eubacterial blue-light receptor, from nanoseconds to seconds. *Biochemistry* 40, 13788–  
461 13801.
- 462 Ren, Z., Chan, P.W.Y., Moffat, K., Pai, E.F., Royer, W.E., Šrajer, V., and Yang, X. (2013). Resolution of  
463 structural heterogeneity in dynamic crystallography. *Acta Cryst D* 69, 946–959.
- 464 Schaffer, J.E., Kukshal, V., Miller, J.J., Kitainda, V., and Jez, J.M. (2021). Beyond X-rays: an overview of  
465 emerging structural biology methods. *Emerg. Top. Life Sci.* ETL520200272.
- 466 Schenkl, S., Mourik, F. van, Zwan, G. van der, Haacke, S., and Chergui, M. (2005). Probing the ultrafast  
467 charge translocation of photoexcited retinal in bacteriorhodopsin. *Science* 309, 917–920.
- 468 Schmidt, M., Rajagopal, S., Ren, Z., and Moffat, K. (2003). Application of singular value decomposition to  
469 the analysis of time-resolved macromolecular X-ray data. *Biophys. J.* 84, 2112–2129.
- 470 Schmidt, M., Graber, T., Henning, R., and Srajer, V. (2010). Five-dimensional crystallography. *Acta*  
471 *Crystallogr. A* 66, 198–206.
- 472 Šrajer, V., Ren, Z., Teng, T.-Y., Schmidt, M., Ursby, T., Bourgeois, D., Praderyand, C., Schildkamp, W.,  
473 Wulff, M., and Moffat, K. (2001). Protein conformational relaxation and ligand migration in myoglobin: A  
474 nanosecond to millisecond molecular movie from time-resolved Laue X-ray diffraction. *Biochemistry* 40,  
475 13802–13815.
- 476 Tahara, S., Kuramochi, H., Takeuchi, S., and Tahara, T. (2019). Protein dynamics preceding  
477 photoisomerization of the retinal chromophore in bacteriorhodopsin revealed by deep-UV femtosecond  
478 stimulated Raman spectroscopy. *J. Phys. Chem. Lett.* 10, 5422–5427.
- 479 Ursby, T., and Bourgeois, D. (1997). Improved estimation of structure-factor difference amplitudes from  
480 poorly accurate data. *Acta Crystallogr. A* 53, 564–575.
- 481 Wang, Q., Schoenlein, R.W., Peteanu, L.A., Mathies, R.A., and Shank, C.V. (1994). Vibrationally coherent  
482 photochemistry in the femtosecond primary event of vision. *Science* 266, 422–424.
- 483 Yang, X., Ren, Z., Kuk, J., and Moffat, K. (2011). Temperature-scan cryocrystallography reveals reaction  
484 intermediates in bacteriophytochrome. *Nature* 479, 428–432.
- 485 Zhong, Q., Ruhman, S., Ottolenghi, M., Sheves, M., Friedman, N., Atkinson, G.H., and Delaney, J.K.  
486 (1996). Reexamining the primary light-induced events in bacteriorhodopsin using a synthetic C13=C14-  
487 locked chromophore. *J Am Chem Soc* 118, 12828–12829.
- 488 (2012). The Protein Data Bank at 40: Reflecting on the Past to Prepare for the Future. *Structure* 20, 391–  
489 396.
- 490
- 491



Ren: Isomerization sampling

492 **Figures and Legends**

493

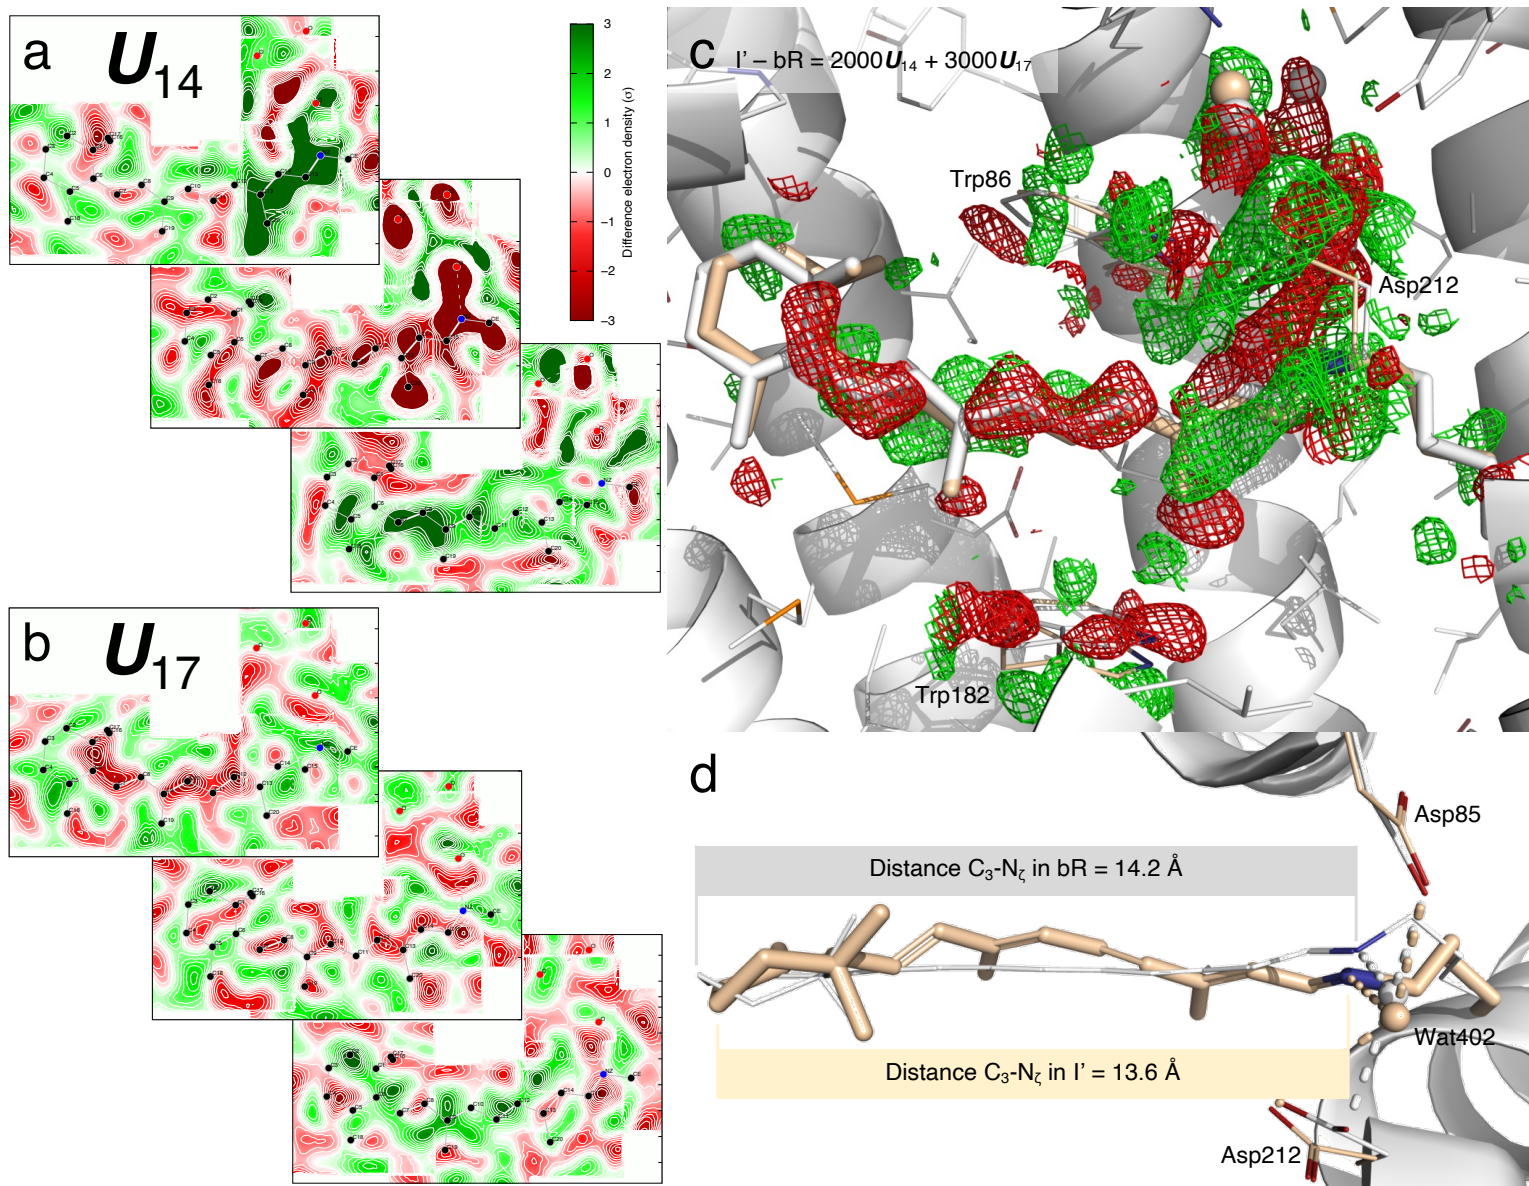

495

496 Figure 1. Shortened retinal in S-shape since earliest intermediate  $I'$ . (a) Cross sections  
497 of component map  $U_{14}$ . The middle cross section is an integration  $\pm 0.2$  Å around the  
498 surface through the retinal. The top cross section is an integration 1.2-1.8 Å outboard  
499 from the retinal surface and the bottom one is an integration 0.8-1.2 Å inboard. See Fig.  
500 S1 for definitions of inboard, outboard, and other orientations in bR molecule. Green  
501 and red indicate electron density gain and loss, respectively. Nearly the entire retinal is  
502 in negative densities. The proximal segment and three waters are in intense negative

Ren: Isomerization sampling

503 densities. On the other hand, strong positive densities flank the proximal and distal  
504 segments from the outboard and inboard, respectively. Such signal distribution results  
505 in the S-shaped retinal by the refinement shown in (d). (b) Cross sections of component  
506 map  $\mathbf{U}_{17}$ . The middle cross section is an integration  $\pm 0.2$  Å around the surface through  
507 the retinal. The top panel is an integration 0.5-0.9 Å outboard and the bottom is an  
508 integration 0.8-1.2 Å inboard. Negative and positive densities flank the retinal from the  
509 outboard and inboard, respectively. (c) Difference map of  $I' - bR$  reconstituted from  $\mathbf{U}_{14}$   
510 and  $\mathbf{U}_{17}$  (a and b). The map is contoured at  $\pm 3\sigma$  in green and red mesh, respectively.  
511 The opposite displacements of the distal and proximal segments of the retinal are  
512 obvious. Extensive signals indicate changes in the water network and Asp85 and 212.  
513 (d) Refined retinal conformation in beige overlaid on the resting state in white. This  
514 view is orthographical to (c). The marked distances from  $C_3$  to  $N_\zeta$  show a shortened  
515 retinal creased into an S-shape.  $C_{20}$  methyl group is tilted  $33^\circ$  toward outboard from its  
516 resting state bR. Wat402 remains in H-bonds with both Asp85 and 212.  
517



Ren: Isomerization sampling

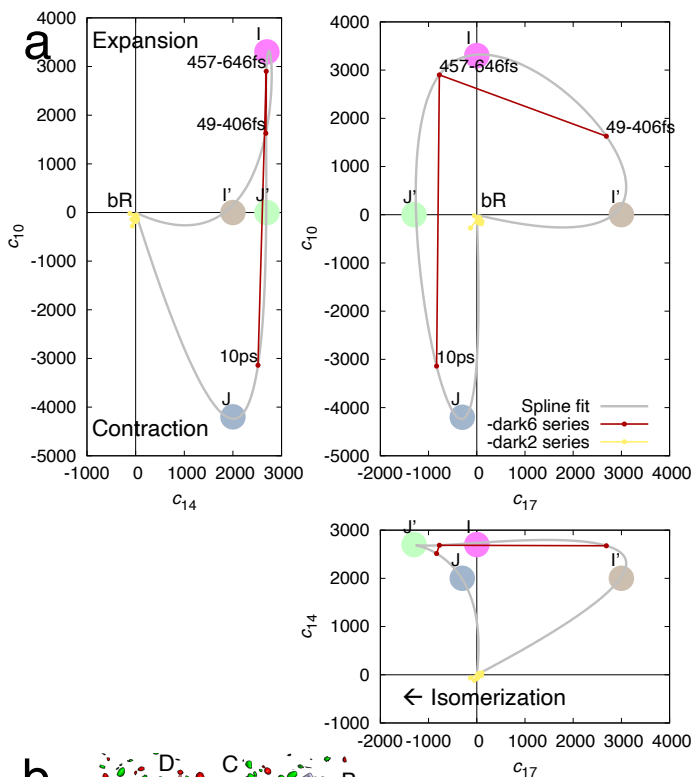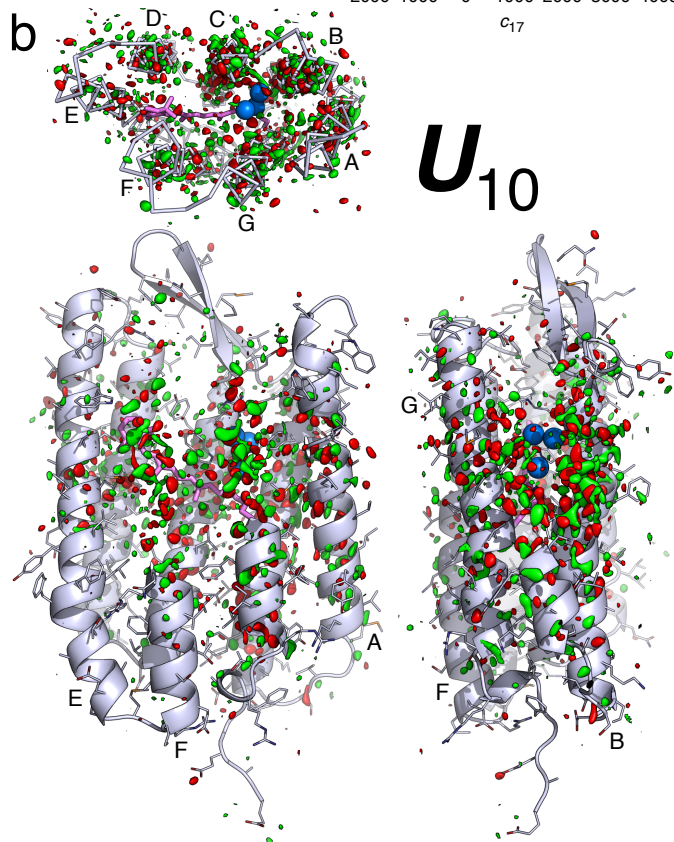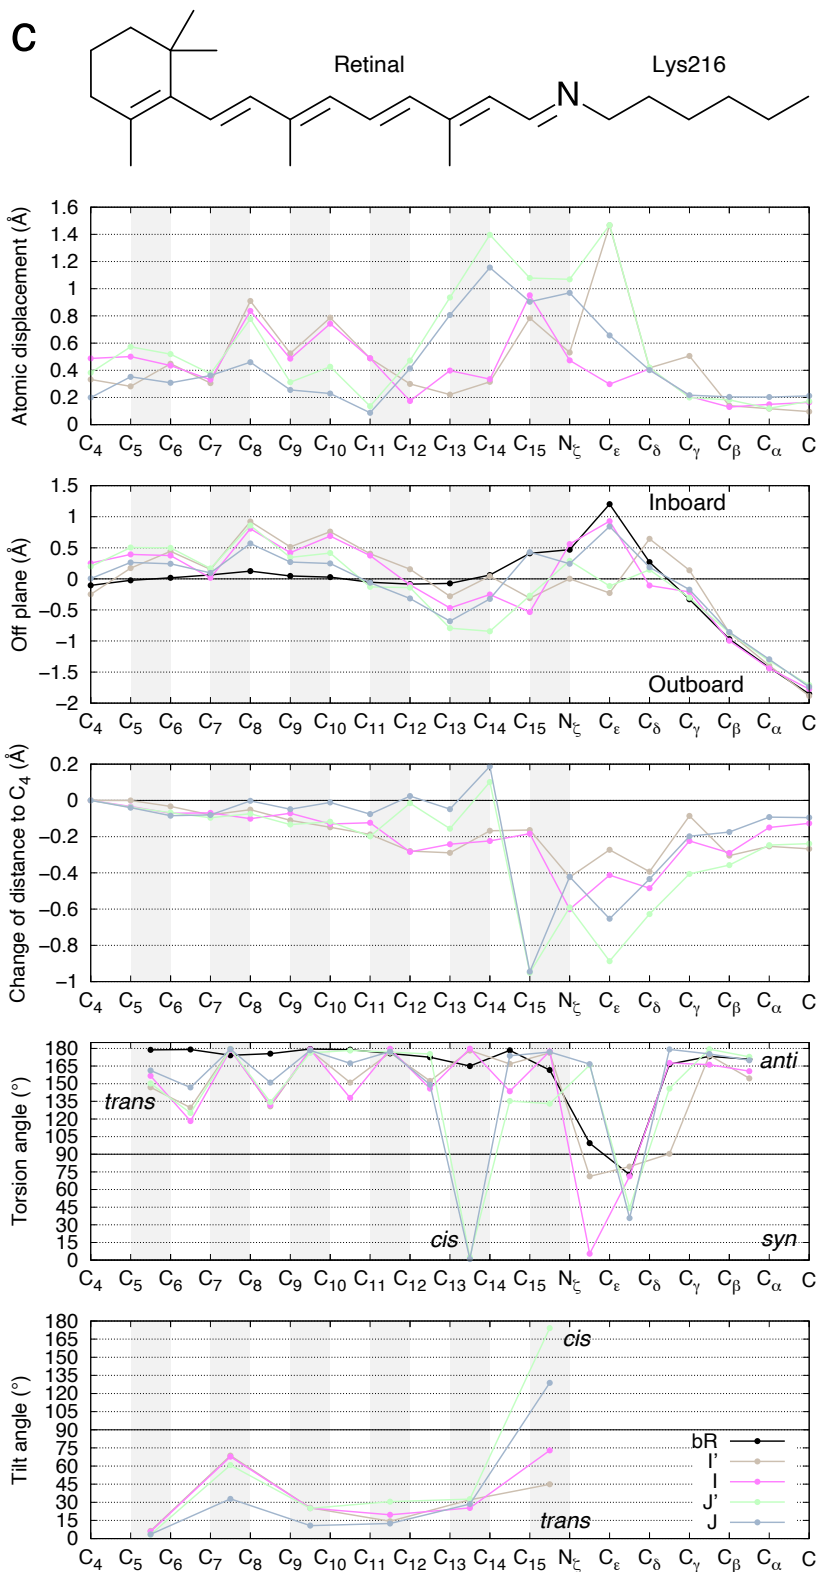

Ren: Isomerization sampling

520 Figure 2. Early intermediates identified in SVD space. (a) Multi-dimensional spaces of  
521 SVD. The SVD analysis of difference Fourier maps at short delays  $\leq 10$  ps results in  
522 time-dependent coefficients  $c_k(t)$ , where  $k = 1, 2, \dots$ , each corresponding to a time-  
523 independent components  $\mathbf{U}_k$ . Each raw difference map at a time delay  $t$  can be closely  
524 represented by a linear combination of these components,  $c_1(t)\mathbf{U}_1 + c_2(t)\mathbf{U}_2 + \dots$ , that is  
525 called a reconstituted difference map. Each of these components  $\mathbf{U}_k$  and the  
526 reconstituted difference maps can be rendered in the same way as an observed  
527 difference map. The coefficient set  $c_k(t)$  is therefore a trace of the photocycle trajectory,  
528 when these time-dependent functions are plotted in a multi-dimensional space or  
529 plotted together against the common variable  $t$ . Coefficients corresponding to  
530 components  $\mathbf{U}_{10}$ ,  $\mathbf{U}_{14}$ , and  $\mathbf{U}_{17}$  are plotted in three orthographical views. Three time  
531 points from Nogly et al. in red contain  $\mathbf{U}_{14}$  equally. These time points vary in  $\mathbf{U}_{10}$  and  
532  $\mathbf{U}_{17}$ . Datasets from Kovacs et al. in yellow do not carry any of these signals, therefore  
533 cluster near the origin. The component map of  $\mathbf{U}_{10}$  is displayed in (b) and  $\mathbf{U}_{14}$  is  
534 displayed in Figs. 1a and S5.  $\mathbf{U}_{17}$  is displayed in Fig. 1b. Several apices of the spline  
535 fitting are chosen as the potential pure states of  $I'$ ,  $I$ ,  $J'$ , and  $J$  marked by large dots. This  
536 choice is only an approximate due to the insufficient number of time points observed.  
537 (b) Component map  $\mathbf{U}_{10}$ . The main chain and side chains of the protein are rendered  
538 with ribbons and sticks, respectively. The retinal and Lys216 are in purple sticks.  
539 Several key waters are in blue spheres. Parts of the structure are omitted to reveal more  
540 of the interior. The map is contoured at  $\pm 3\sigma$  in green and red, respectively. Three  
541 orthographical views of  $\mathbf{U}_{10}$  clearly show that the signals are distributed around the  
542 middle segment of the molecule and taper off to both CP and EC surfaces. The signals  
543 also concentrate at all seven helices. (c) Conformational parameters calculated from the  
544 refined chromophore. The chemical structure of the chromophore on top is aligned to  
545 the horizontal axis. Double bonds are shaded in gray. Atomic displacements of each  
546 intermediate from the resting state show greater changes in the proximal segment (top  
547 panel). A plane is least-squares fitted to  $C_4$  through  $C_{14}$  of the resting state. The  
548 distances of all atoms to this plane in the inboard and outboard directions show the  
549 curvature of the chromophore. The creased retinal in early intermediates and the  
550 inboard protruding corner at  $C_6$  in the resting state are clearly shown (2<sup>nd</sup> panel).  
551 Distances to atom  $C_4$  are calculated for all refined chromophores. Changes in these  
552 distances with respect to the resting state show the shortened chromophore in  $I'$  and  $I$ .  
553 Once isomerization to 13-*cis* occurs, the segment from  $C_{15}$  to  $C_8$  around the SB becomes

Ren: Isomerization sampling

554 significantly closer to the  $\beta$ -ionone ring due to the Coulomb attraction force, while the  
555 distal segment of the retinal from C<sub>14</sub> and beyond stretches (3<sup>rd</sup> panel). The torsion  
556 angles of single and double bonds quantify *anti/syn* or *trans/cis* for the ground state and  
557 all intermediates (4<sup>th</sup> panel). Only a single bond can be twisted with its torsion angle  
558 near 90°. A twisted double bond would be energetically costly. Each double bond is  
559 least-squares fitted with a plane. The interplanar angle between a double bond and the  
560 corresponding one in the ground state measures the local tilting of the retinal (bottom  
561 panel).

562

563

Ren: Isomerization sampling

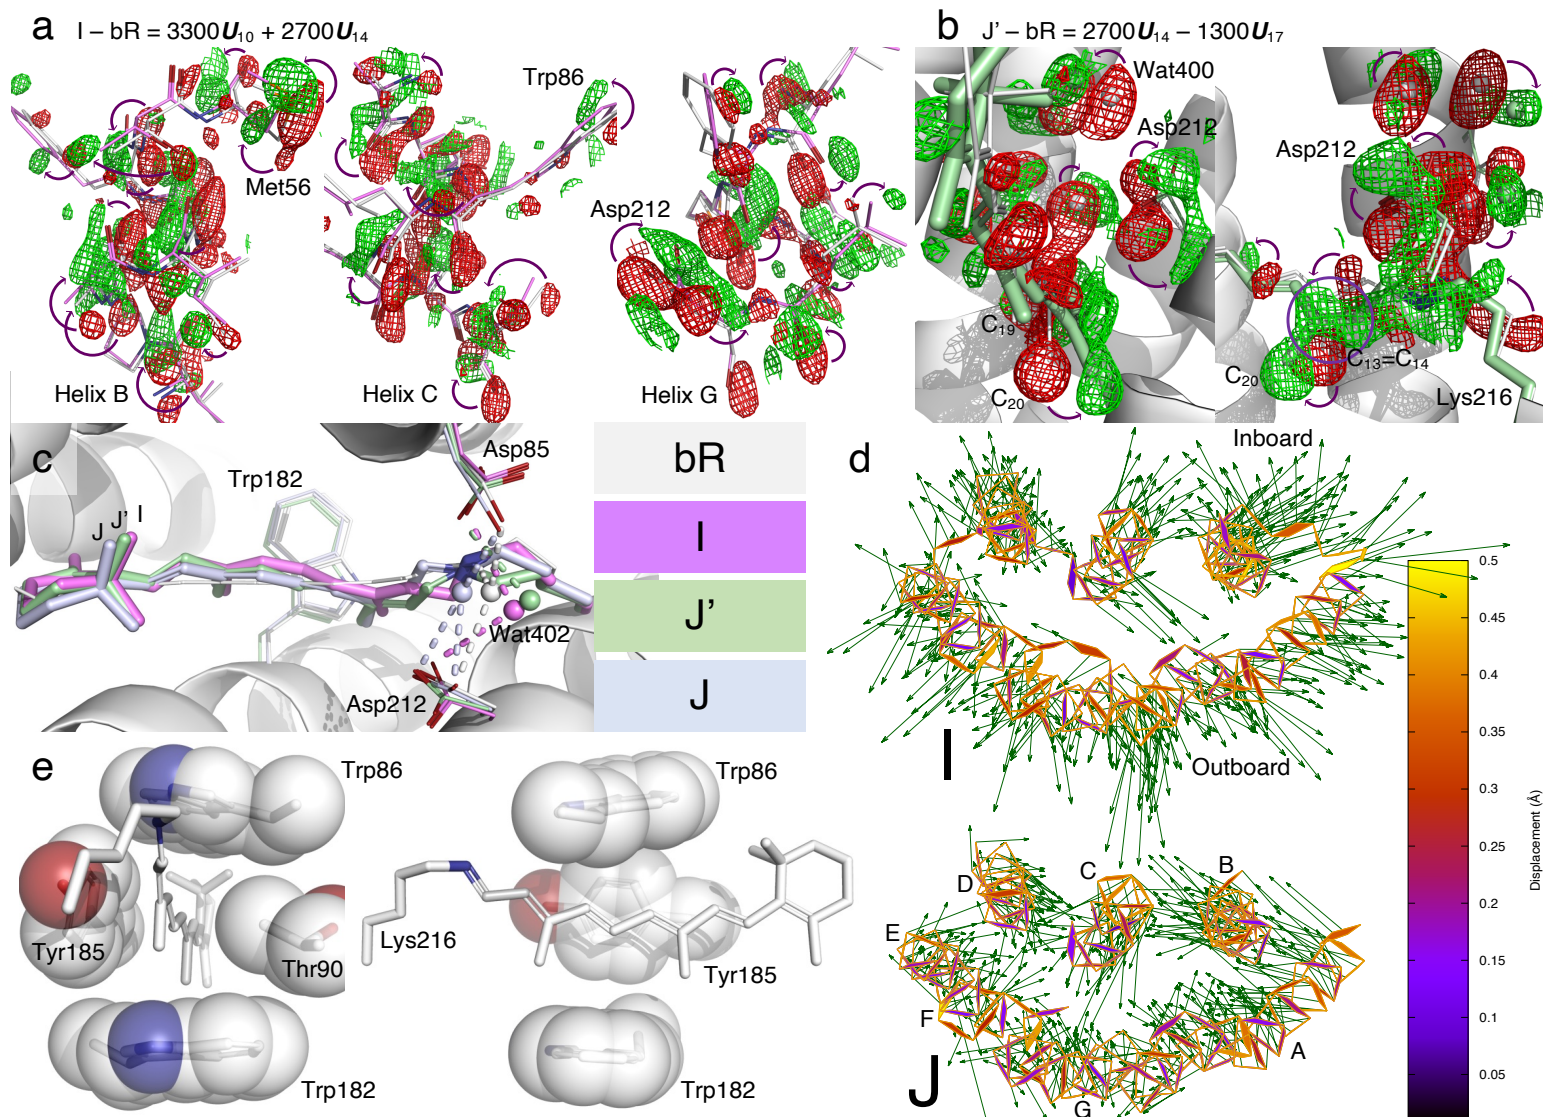

565  
 566 Figure 3. Intermediates I, J', J, and retinal binding pocket expansion and contraction.  
 567 (a) Reconstituted difference map I – bR from  $U_{10}$  and  $U_{14}$  (Figs. 1a, 2ab, and S5). The  
 568 map is contoured at  $\pm 2.5\sigma$  in green and red mesh, respectively. The difference map at  
 569 three middle segments of helices B, C, and G show main chain displacements toward  
 570 inboard or outboard as indicated by the arrows marking the negative and positive pairs  
 571 of densities. These difference densities are the direct evidence of the expansion of the  
 572 retinal binding pocket. The refined structure of I is in purple and the resting state is in  
 573 white. (b) Reconstituted difference map J' – bR from  $U_{14}$  and  $U_{17}$  (Figs. 1ab, 2a, and S5).  
 574 The map is contoured at  $\pm 3.5\sigma$  in green and red mesh, respectively. These difference  
 575 densities are the direct evidence of isomerization at hundreds of fs. The refined  
 576 structure of J' in 13-*cis* is in green. (c) The refined 13-*cis* retinal conformation compared



Ren: Isomerization sampling

577 with the resting state in white. I, J', and J are in purple, green, and bluish gray,  
578 respectively. The creased S-shape is easing gradually (Fig. 2c 2<sup>nd</sup> panel). (d) The refined  
579 structures of I and J compared with the resting state viewed along the trimer three-fold  
580 axis from the EC side. Atomic displacements in the main chain from bR to I and J are  
581 color coded and marked by arrows with lengths 20× of the actual displacements. All  
582 seven helices in I move away from the center except a small segment in helix C showing  
583 an expansion of the retinal binding pocket (top panel). However, all seven helices in J  
584 move closer to one another showing a contraction with respect to the resting state bR  
585 (bottom panel). This contraction is much more significant if compared directly with the  
586 expanded I state. (e) Two orthographical views of the retinal tightly boxed at its middle  
587 segment. The closest contact is Thr90 and Tyr185 on the inboard and outboard sides of  
588 the retinal plane, respectively. The minimum distance between them is  $7.0 \text{ \AA} = 4r_C + 0.2$   
589  $\text{ \AA}$ , where  $r_C = 1.7 \text{ \AA}$  is the van der Waals radius of C. See also (Kandori, 2015).  
590  
591

Ren: Isomerization sampling

# 592 **Photoinduced Isomerization Sampling of Retinal in** 593 **Bacteriorhodopsin**

594

595 Zhong Ren

596

597 Department of Chemistry, University of Illinois at Chicago, Chicago, IL 60607, USA

598 Renz Research, Inc., Westmont, IL 60559, USA

599

600 [zren@uic.edu](mailto:zren@uic.edu)

601 ORCID 0000-0001-7098-3127

602

## 603 **Methods**

604 From the outset, the key presumption is that every crystallographic dataset, at a given  
605 temperature and a given time delay after the triggering of a photochemical reaction,  
606 captures a mixture of unknown number of intermediate species at unknown fractions.  
607 Needless to say, all structures of the intermediates are also unknown except the  
608 structure at the ground state that has been determined and well refined by static  
609 crystallography. A simultaneous solution of all these unknowns requires multiple  
610 datasets that are collected at various temperatures or time delays so that a common set  
611 of intermediate structures are present in these datasets with variable ratios. If the  
612 number of available datasets is far greater than the number of unknowns, a linear  
613 system can be established to overdetermine the unknowns with the necessary  
614 stereochemical restraints (Ren et al., 2013). The analytical methods used in this work to  
615 achieve such overdetermination have been incrementally developed in the past years  
616 and recently applied to another joint analysis of the datasets of carbonmonoxy  
617 myoglobin (Ren, 2019). Time-resolved datasets collected with ultrashort pulses from an  
618 X-ray free electron laser were successfully analyzed by these methods to visualize  
619 electron density components that reveal transient heating, *3d* electrons of the heme iron,  
620 and global vibrational motions. This analytical strategy is recapped below.

621

622 The methodological advance in this work is the refinement of each pure  
623 intermediate structure that has been deconvoluted from multiple mixtures. Structure  
624 factor amplitudes of a single conformation free of heterogeneity are overdetermined.



## Ren: Isomerization sampling

625 Given the deconvoluted structure factor amplitude set of a pure state, the standard  
626 structural refinement software with the built-in stereochemical constraints is taken full  
627 advantage of, e.g. PHENIX (Adams et al., 2010; Liebschner et al., 2019). In case that the  
628 computed deconvolution has not achieved a single pure structural species, the  
629 structural refinement is expected to make such indication.

630

### 631 *Difference Fourier maps*

632 A difference Fourier map is synthesized from a Fourier coefficient set of  $F_{\text{light}} - F_{\text{reference}}$   
633 with the best available phase set, often from the ground state structure. Before Fourier  
634 synthesis,  $F_{\text{light}}$  and  $F_{\text{reference}}$  must be properly scaled to the same level so that the  
635 distribution of difference values is centered at zero and not skewed either way. A  
636 weighting scheme proven effective assumes that a greater amplitude of a difference  
637 Fourier coefficient  $F_{\text{light}} - F_{\text{reference}}$  is more likely caused by noise than by signal (Ren et al.,  
638 2001, 2013; Šrajer et al., 2001; Ursby and Bourgeois, 1997). Both the dark and light  
639 datasets can serve as a reference in difference maps. If a light dataset at a certain delay  
640 is chosen as a reference, the difference map shows the changes since that delay time but  
641 not the changes prior to that delay. However, both the dark and light datasets must be  
642 collected in the same experiment. A cross reference from a different experimental  
643 setting usually causes large systematic errors in the difference map that would swamp  
644 the desired signals. Each difference map is masked 3.5 Å around the entire molecule of  
645 bacteriorhodopsin (bR). No lipid density is analyzed.

646

### 647 *Meta-analysis of protein structures*

648 Structural meta-analysis based on singular value decomposition (SVD) has been  
649 conducted in two forms. In one of them, an interatomic distance matrix is calculated  
650 from each protein structure in a related collection. SVD of a data matrix consists of  
651 these distance matrices enables a large-scale joint structural comparison but requires no  
652 structural alignment (Ren, 2013a, 2013b, 2016). In the second form, SVD is performed  
653 on a data matrix of electron densities of related protein structures (Ren, 2019; Ren et al.,  
654 2013; Schmidt et al., 2003, 2010). Both difference electron density maps that require a  
655 reference dataset from an isomorphous crystal form and simulated annealing omit  
656 maps that do not require the same unit cell and space group of the crystals are possible  
657 choices in a structural meta-analysis (Ren, 2019; Ren et al., 2013). The interatomic  
658 distances or the electron densities that SVD is performed on are called core data. Each

## Ren: Isomerization sampling

659 distance matrix or electron density map is associated with some metadata that describe  
660 the experimental conditions under which the core data are obtained, such as  
661 temperature, pH, light illumination, time delay, mutation, etc. These metadata do not  
662 enter the SVD procedure. However, they play important role in the subsequent  
663 interpretation of the SVD result. This computational method of structural analysis takes  
664 advantage of a mathematical, yet practical, definition of conformational space with  
665 limited dimensionality (Ren, 2013a). Each experimentally determined structure is a  
666 snapshot of the protein structure. A large number of such snapshots taken under a  
667 variety of experimental conditions, the metadata, would collectively provide a survey of  
668 the accessible conformational space of the protein structure and reveal its reaction  
669 trajectory. Such joint analytical strategy would not be effective in early years when far  
670 fewer protein structures were determined to atomic resolution. Recent rapid growth in  
671 protein crystallography, such as in structural genomics (Chandonia and Brenner, 2006,  
672 2012) and in serial crystallography (Glynn and Rodriguez, 2019; Schaffer et al., 2021),  
673 has supplied the necessarily wide sampling of protein structures for a joint analytical  
674 strategy to come of age. The vacancies or gaps in a conformational space between well-  
675 populated conformational clusters often correspond to less stable transient states whose  
676 conformations are difficult to capture, if not impossible. These conformations are often  
677 key to mechanistic understanding and could be explored by a back calculation based on  
678 molecular distance geometry (Ren, 2013a, 2016), the chief computational algorithm in  
679 nucleic magnetic resonance spectroscopy (NMR), and by a structure refinement based  
680 on reconstituted dataset, a major methodological advance in this work (see below).  
681 These structures refined to atomic resolution against reconstituted datasets may reveal  
682 short-lived intermediate conformation hard to be captured experimentally.  
683 Unfortunately, a protein structure refined against a reconstituted dataset currently  
684 cannot be recognized by the Protein Data Bank (PDB). Because crystallographic  
685 refinement of a macromolecular structure is narrowly defined as a correspondence from  
686 one dataset to one structure. A never-observed dataset reconstituted from a collection  
687 of experimental datasets does not match the well-established crystallographic template  
688 of PDB; let alone a refinement of crystal structure with the NMR algorithm.

689

690 A distance matrix contains  $M$  pairwise interatomic distances of a structure in the  
691 form of Cartesian coordinates of all observed atoms. An everyday example of distance  
692 matrix is an intercity mileage chart appended to the road atlas. Differences in the

Ren: Isomerization sampling

693 molecular orientation, choice of origin, and crystal lattice among all experimentally  
694 determined structures have no contribution to the distance matrices. Due to its  
695 symmetry, only the lower triangle is necessary. A far more intimate examination of  
696 protein structures in PDB is a direct analysis of their electron density maps instead of  
697 the atomic coordinates.  $M$  such (difference) electron densities, often called voxels in  
698 computer graphics, are selected by a mask of interest. In the case of difference maps,  
699 only the best refined protein structure in the entire collection supplies a phase set for  
700 Fourier synthesis of electron density maps. This best structure is often the ground state  
701 structure determined by static crystallography. Other refined atomic coordinates from  
702 the PDB entries are not considered in the meta-analysis. That is to say, a meta-analysis  
703 of difference electron density maps starts from the X-ray diffraction data archived in  
704 PDB rather than the atomic coordinates interpreted from the diffraction data, which  
705 removes any potential model bias.

706

707 *Singular value decomposition of (difference) electron density maps*

708 An electron density map, particularly a difference map as emphasized here, consists of  
709 density values on an array of grid points within a mask of interest. All  $M$  grid points in  
710 a three-dimensional map can be serialized into a one-dimensional sequence of density  
711 values according to a specific protocol. It is not important what the protocol is as long  
712 as a consistent protocol is used to serialize all maps of the same grid setting and size,  
713 and a reverse protocol is available to erect a three-dimensional map from a sequence of  
714  $M$  densities. Therefore, a set of  $N$  serialized maps, also known as vectors in linear  
715 algebra, can fill the columns of a data matrix  $\mathbf{A}$  with no specific order, so that the width  
716 of  $\mathbf{A}$  is  $N$  columns, and the length is  $M$  rows. Often,  $M \gg N$ , thus  $\mathbf{A}$  is an elongated  
717 matrix. If a consistent protocol of serialization is used, the corresponding voxel in all  $N$   
718 maps occupies a single row of matrix  $\mathbf{A}$ . This strict correspondence in a row of matrix  
719  $\mathbf{A}$  is important. Changes of the density values in a row from one structure to another  
720 are due to either signals, systematic errors, or noises. Although the order of columns in  
721 matrix  $\mathbf{A}$  is unimportant, needless to say, the metadata associated with each column  
722 must remain in good bookkeeping.

723

724 SVD of the data matrix  $\mathbf{A}$  results in  $\mathbf{A} = \mathbf{U}\mathbf{W}\mathbf{V}^T$ , also known as matrix factorization.  
725 Matrix  $\mathbf{U}$  has the same shape as  $\mathbf{A}$ , that is,  $N$  columns and  $M$  rows. The  $N$  columns  
726 contain decomposed basis components  $\mathbf{U}_k$ , known as left singular vectors of  $M$  items,

Ren: Isomerization sampling

727 where  $k = 1, 2, \dots, N$ . Therefore, each component  $\mathbf{U}_k$  can be erected using the reverse  
728 protocol to form a three-dimensional map. This decomposed elemental map can be  
729 presented in the same way as the original maps, for example, rendered in molecular  
730 graphics software such as Coot and PyMol. It is worth noting that these decomposed  
731 elemental maps or map components  $\mathbf{U}_k$  are independent of any metadata. That is to  
732 say, these components remain constant when the metadata vary. Since each left  
733 singular vector  $\mathbf{U}_k$  has a unit length due to the orthonormal property of SVD (see  
734 below), that is,  $|\mathbf{U}_k| = 1$ , the root mean squares (rms) of the items in a left singular  
735 vector is  $1/\sqrt{M}$  that measures the quadratic mean of the items.

736  
737 The second matrix  $\mathbf{W}$  is a square matrix that contains all zeros except for  $N$  positive  
738 values on its major diagonal, known as singular values  $w_k$ . The magnitude of  $w_k$  is  
739 considered as a weight or significance of its corresponding component  $\mathbf{U}_k$ . The third  
740 matrix  $\mathbf{V}$  is also a square matrix of  $N \times N$ . Each column of  $\mathbf{V}$  or row of its transpose  $\mathbf{V}^T$ ,  
741 known as a right singular vector  $\mathbf{V}_k$ , contains the relative compositions of  $\mathbf{U}_k$  in each of  
742 the  $N$  original maps. Therefore, each right singular vector  $\mathbf{V}_k$  can be considered as a  
743 function of the metadata. Right singular vectors also have the same unit length, that is,  
744  $|\mathbf{V}_k| = 1$ . Effectively, SVD separates the constant components independent of the  
745 metadata from the compositions that depend on the metadata.

746  
747 A singular triplet denotes 1) a decomposed component  $\mathbf{U}_k$ , 2) its singular value  $w_k$ ,  
748 and 3) the composition function  $\mathbf{V}_k$ . Singular triplets are often sorted in a descending  
749 order of their singular values  $w_k$ . Only a small number of  $n$  significant singular triplets  
750 identified by the greatest singular values  $w_1$  through  $w_n$  can be used in a linear  
751 combination to reconstitute a set of composite maps that closely resemble the original  
752 ones in matrix  $\mathbf{A}$ , where  $n < N$ . For example, the original map in the  $i$ th column of  
753 matrix  $\mathbf{A}$  under a certain experimental condition can be closely represented by the  $i$ th  
754 composite map  $w_1 v_{1i} \mathbf{U}_1 + w_2 v_{2i} \mathbf{U}_2 + \dots + w_n v_{ni} \mathbf{U}_n$ , where  $(v_{1i}, v_{2i}, \dots)$  is from the  $i$ th row of  
755 matrix  $\mathbf{V}$ . The coefficient set for the linear combination is redefined here as  $c_{ki} =$   
756  $w_k v_{ki} / \sqrt{M}$ . The rms of the density values in a map component, or the average magnitude  
757 measured by the quadratic mean, acts as a constant scale factor that resets the modified  
758 coefficients  $c_{ki}$  back to the original scale of the core data, such as Å for distance matrices  
759 and  $e/\text{Å}^3$  for electron density maps if these units are used in the original matrix  $\mathbf{A}$ .  
760 Practically, an electron density value usually carries an arbitrary unit without a

Ren: Isomerization sampling

761 calibration, which makes this scale factor unnecessary. In the linear combination  $c_{1i}\mathbf{U}_1 +$   
762  $c_{2i}\mathbf{U}_2 + \dots + c_{ni}\mathbf{U}_n$ , each component  $\mathbf{U}_k$  is independent of the metadata while how much of  
763 each component is required for the approximation, that is,  $c_{ki}$ , depends on the metadata.  
764

765 Excluding the components after  $\mathbf{U}_n$  in this approximation is based on an assumption  
766 that the singular values after  $w_n$  are very small relative to those from  $w_1$  through  $w_n$ . As  
767 a result, the structural information evenly distributed in all  $N$  original maps is  
768 effectively concentrated into a far fewer number of  $n$  significant components, known as  
769 information concentration or dimension reduction. On the other hand, the trailing  
770 components in matrix  $\mathbf{U}$  contain inconsistent fluctuations and random noises.  
771 Excluding these components effectively rejects noises (Schmidt et al., 2003). The least-  
772 squares property of SVD guarantees that the rejected trailing components sums up to  
773 the least squares of the discrepancies between the original core data and the  
774 approximation using the accepted components.

775  
776 However, no clear boundary is guaranteed between signals, systematic errors, and  
777 noises. Systematic errors could be more significant than the desired signals. Therefore,  
778 excluding some components from 1 through  $n$  is also possible. If systematic errors are  
779 correctly identified, the reconstituted map without these significant components would  
780 no longer carry the systematic errors.

781  
782 *The orthonormal property of SVD*

783 The solution set of SVD must guarantee that the columns in  $\mathbf{U}$  and  $\mathbf{V}$ , the left and right  
784 singular vectors  $\mathbf{U}_k$  and  $\mathbf{V}_k$ , are orthonormal, that is,  $\mathbf{U}_h \bullet \mathbf{U}_k = \mathbf{V}_h \bullet \mathbf{V}_k = 0$  (ortho) and  $\mathbf{U}_k \bullet \mathbf{U}_k$   
785  $= \mathbf{V}_k \bullet \mathbf{V}_k = 1$  (normal), where  $h \neq k$  but both are from 1 to  $N$ . The orthonormal property  
786 also holds for the row vectors. As a result, each component  $\mathbf{U}_k$  is independent of the  
787 other components. In other words, a component cannot be represented by a linear  
788 combination of any other components. However, two physical or chemical parameters  
789 in the metadata, such as temperature and pH, may cause different changes to a  
790 structure. These changes are not necessarily orthogonal. They could exhibit some  
791 correlation. Therefore, the decomposed components  $\mathbf{U}_k$  not necessarily represent any  
792 physically or chemically meaningful changes (see below).

793

## Ren: Isomerization sampling

794 Due to the orthonormal property of SVD, an  $N$ -dimensional Euclidean space is  
795 established, and the first  $n$  dimensions define its most significant subspace. Each  
796 coefficient set  $c_i = (c_{1i}, c_{2i}, \dots, c_{ni})$  of the  $i$ th composite map is located in this  $n$ -dimensional  
797 subspace. All coefficient sets for  $i = 1, 2, \dots, N$  in different linear combinations to  
798 approximate the  $N$  original maps in a least-squares sense can be represented by  $N$   
799 points or vectors  $c_1, c_2, \dots, c_N$  in the Euclidean subspace. This  $n$ -dimensional subspace is  
800 essentially the conformational space as surveyed by the jointly analyzed core data. The  
801 conformational space is presented as scatter plots with each captured structure  
802 represented as a dot located at a position determined by the coefficient set  $c_i$  of the  $i$ th  
803 observed map. When the subspace has greater dimensionality than two, multiple two-  
804 dimensional orthographical projections of the subspace are presented, such as Fig. 2a.  
805 These scatter plots are highly informative to reveal the relationship between the  
806 (difference) electron density maps and their metadata.

807  
808 If two coefficient sets  $c_i \approx c_j$ , they are located close to each other in the  
809 conformational space. Therefore, these two structures  $i$  and  $j$  share two similar  
810 conformations. Two structures located far apart from each other in the conformational  
811 space are dissimilar in their conformations, and distinct in the compositions of the map  
812 components. A reaction trajectory emerges in this conformational space if the temporal  
813 order of the core data is experimentally determined (Fig. 2a). Otherwise, an order could  
814 be assigned to these structures based on an assumed smoothness of conformational  
815 changes along a reaction trajectory (Ren, 2013a, 2013b, 2016). Causation and  
816 consequence of structural motions could be revealed from the order of the structures in  
817 a series, which may further lead to structural mechanism. In addition, an off-trajectory  
818 location in the conformational space or a location between two clusters of observed  
819 structures represents a structure in a unique conformation that has never been  
820 experimentally captured. Such a hypothetical structure can be refined against a  
821 reconstituted distance matrix using molecular distance geometry (Ren, 2013a, 2013b,  
822 2016) or a reconstituted electron density map with the method proposed below.

823

### 824 *Rotation in SVD space*

825 Dimension reduction is indeed effective in meta-analysis of protein structures when  
826 many datasets are evaluated at the same time. However, the default solution set of SVD  
827 carries complicated physical and chemical meanings that are not immediately obvious.



Ren: Isomerization sampling

828 The interpretation of a basis component  $\mathbf{U}_k$ , that is, “what-does-it-mean”, requires a  
829 clear demonstration of the relationship between the core data and their metadata. The  
830 outcome of SVD does not guarantee any physical meaning in a basis component.  
831 Therefore, SVD alone provides no direct answer to “what-does-it-mean”, thus its  
832 usefulness is very limited to merely a mathematical construction. However, the  
833 factorized set of matrices  $\mathbf{U}$ ,  $\mathbf{W}$ , and  $\mathbf{V}$  from SVD is not a unique solution. That is to say,  
834 they are not the only solution to factorize matrix  $\mathbf{A}$ . Therefore, it is very important to  
835 find one or more alternative solution sets that are physically meaningful to elucidate a  
836 structural interpretation. The concept of a rotation after SVD was introduced by Henry  
837 & Hofrichter (Henry and Hofrichter, 1992). But they suggested a protocol that fails to  
838 preserve the orthonormal and least-squares properties of SVD. The rotation protocol  
839 suggested by Ren incorporates the metadata into the analysis and combines with SVD  
840 of the core data. This rotation achieves a numerical deconvolution of multiple physical  
841 and chemical factors after a pure mathematical decomposition, and therefore, provides  
842 a route to answer the question of “what-does-it-mean” (Ren, 2019). This rotation shall  
843 not be confused with a rotation in the three-dimensional real space, in which a  
844 molecular structure resides.

845  
846 A rotation in the  $n$ -dimensional Euclidean subspace is necessary to change the  
847 perspective before a clear relationship emerges to elucidate scientific findings. It is  
848 shown below that two linear combinations are identical before and after a rotation  
849 applied to both the basis components and their coefficients in a two-dimensional  
850 subspace of  $h$  and  $k$ . That is,

851

$$c_h \mathbf{U}_h + c_k \mathbf{U}_k = f_h \mathbf{R}_h + f_k \mathbf{R}_k, \quad (1)$$

852  
853 where  $c_h$  and  $c_k$  are the coefficients of the basis components  $\mathbf{U}_h$  and  $\mathbf{U}_k$  before the  
854 rotation; and  $f_h$  and  $f_k$  are the coefficients of the rotated basis components  $\mathbf{R}_h$  and  $\mathbf{R}_k$ ,  
855 respectively. The same Givens rotation of an angle  $\theta$  is applied to both the components  
856 and their coefficients:

857

$$\begin{cases} \mathbf{R}_h = \mathbf{U}_h \cos\theta - \mathbf{U}_k \sin\theta; \\ \mathbf{R}_k = \mathbf{U}_h \sin\theta + \mathbf{U}_k \cos\theta. \end{cases} \quad (2)$$

858

Ren: Isomerization sampling

859 Obviously, the rotated components  $\mathbf{R}_h$  and  $\mathbf{R}_k$  remain mutually orthonormal and  
 860 orthonormal to other components. And

861

$$\begin{cases} f_h = s_h t_h = c_h \cos \theta - c_k \sin \theta; \\ f_k = s_k t_k = c_h \sin \theta + c_k \cos \theta. \end{cases} \quad (3)$$

862

863 Here  $s_{h|k} = \sqrt{\sum f_{h|k}^2}$  are the singular values that replace  $w_h$  and  $w_k$ , respectively, after the  
 864 rotation. They may increase or decrease compared to the original singular values so  
 865 that the descending order of the singular values no longer holds.  $\mathbf{T}_{h|k} = (t_{h|k1}, t_{h|k2}, \dots,$   
 866  $t_{h|kN}) = (f_{h|k1}, f_{h|k2}, \dots, f_{h|kN})/s_{h|k}$  are the right singular vectors that replace  $\mathbf{V}_h$  and  $\mathbf{V}_k$ ,  
 867 respectively.  $\mathbf{T}_h$  and  $\mathbf{T}_k$  remain mutually orthonormal after the rotation and  
 868 orthonormal to other right singular vectors that are not involved in the rotation.

869

870 To prove Eq. 1, Eqs. 2 and 3 are combined and expanded. All cross terms of sine and  
 871 cosine are self-canceled:

872

$$\begin{aligned} 873 f_h \mathbf{R}_h + f_k \mathbf{R}_k &= (c_h \cos \theta - c_k \sin \theta)(\mathbf{U}_h \cos \theta - \mathbf{U}_k \sin \theta) + (c_h \sin \theta + c_k \cos \theta)(\mathbf{U}_h \sin \theta + \mathbf{U}_k \cos \theta) \\ 874 &= c_h \mathbf{U}_h \cos^2 \theta + c_k \mathbf{U}_k \sin^2 \theta + c_h \mathbf{U}_h \sin^2 \theta + c_k \mathbf{U}_k \cos^2 \theta \pm c_h \mathbf{U}_k \sin \theta \cos \theta \pm c_k \mathbf{U}_h \sin \theta \cos \theta \\ 875 &= c_h \mathbf{U}_h (\cos^2 \theta + \sin^2 \theta) + c_k \mathbf{U}_k (\sin^2 \theta + \cos^2 \theta) \\ 876 &= c_h \mathbf{U}_h + c_k \mathbf{U}_k \end{aligned}$$

877

878 A rotation in two-dimensional subspace of  $h$  and  $k$  has no effect in other dimensions,  
 879 as the orthonormal property of SVD guarantees. Multiple steps of rotations can be  
 880 carried out in many two-dimensional subspaces consecutively to achieve a multi-  
 881 dimensional rotation. A new solution set derived from a rotation retains the  
 882 orthonormal property of SVD. The rotation in the Euclidean subspace established by  
 883 SVD does not change the comparison among the core data of protein structures. Rather  
 884 it converts one solution set  $\mathbf{A} = \mathbf{U}\mathbf{W}\mathbf{V}^T$  to other alternative solutions  $\mathbf{A} = \mathbf{R}\mathbf{S}\mathbf{T}^T$  so that  
 885 an appropriate perspective can be found to elucidate the relationship between the core  
 886 data and metadata clearly and concisely.

887

888 For example, if one physical parameter could be reoriented along a single dimension  
 889  $k$  but not involving other dimensions by a rotation, it can be convincingly shown that  
 890 the left singular vector  $\mathbf{U}_k$  of this dimension illustrates the structural impact by this

Ren: Isomerization sampling

891 physical parameter. Before this rotation, the same physical parameter may appear to  
892 cause structural variations along several dimensions, which leads to a difficult  
893 interpretation. Would a proper rotation establish a one-on-one correspondence from all  
894 physical or chemical parameters to all the dimensions? It depends on whether each  
895 parameter induces an orthogonal structural change, that is, whether structural  
896 responses to different parameters are independent or correlated among one another. If  
897 structural changes are indeed orthogonal, it should be possible to find a proper rotation  
898 to cleanly separate them in different dimensions. Otherwise, two different rotations are  
899 necessary to isolate two correlated responses, but one at a time.

900  
901 For another example, if the observed core datasets form two clusters in the  
902 conformational space, a rotation would be desirable to separate these clusters along a  
903 single dimension  $k$  but to align these clusters along other dimensions. Therefore, the  
904 component  $\mathbf{U}_k$  is clearly due to the structural transition from one cluster to the other.  
905 Without a proper rotation, the difference between these clusters could be complicated  
906 with multiple dimensions involved. A deterministic solution depends on whether a  
907 clear correlation exists between the core data and metadata. A proper rotation may  
908 require a user decision. A wrong choice of rotation may select a viewpoint that hinders  
909 a concise conclusion. However, it would not alter the shape of the reaction trajectory,  
910 nor create or eliminate an intrinsic structural feature. A wrong choice of rotation cannot  
911 eliminate the fact that a large gap exists between two clusters of observed core datasets  
912 except that these clusters are not obvious from that viewpoint. A different rotation may  
913 reorient the perspective along another direction. But the structural conclusion would be  
914 equivalent. See example of before and after a rotation in (Ren, 2016).

915  
916 This rotation procedure finally connects the core crystallographic datasets to the  
917 metadata of experimental conditions and accomplishes the deconvolution of physical or  
918 chemical factors that are not always orthogonal to one another after a mathematical  
919 decomposition. SVD analysis presented in this paper employs rotations extensively  
920 except that no distinction is made in the symbols of components and coefficients before  
921 and after a rotation except in this section. This method is widely applicable in large-  
922 scale structural comparisons. Furthermore, Ren rotation after SVD is not limited to  
923 crystallography and may impact other fields wherever SVD is used. For example, SVD  
924 is frequently applied to spectroscopic data, images, and genetic sequence data.

Ren: Isomerization sampling

925

926 *Structural refinement against reconstituted dataset*

927 The linear combination  $\Delta\rho(t) = f_1(t)\mathbf{R}_1 + f_2(t)\mathbf{R}_2 + \dots + f_n(t)\mathbf{R}_n$  after a rotation reconstitutes  
928 one of the observed difference maps at a specific time point  $t$ . This time-dependent  
929 difference map depicts an ever-evolving mixture of many excited species. A  
930 reconstituted difference map  $\Delta\rho(E)$  for a time-independent, pure, excited species  $E =$   
931 intermediate  $I', I, J',$  and  $J$  deconvoluted from many mixtures would take the same form  
932 except that only one or very few coefficients remain nonzero if a proper rotation has  
933 been found (Table S2). In order to take advantage of the mature refinement software for  
934 macromolecular structures with extensive stereochemical restraints, a set of structure  
935 factor amplitudes is needed. Therefore, it is necessary to reconstitute a set of structure  
936 factor amplitudes that would produce the target difference map  $\Delta\rho(E)$  based on a  
937 known structure at the ground state. First, an electron density map of the structure at  
938 the ground state is calculated. This calculated map is used as a base map. Second, this  
939 base map of the ground state is combined with the positive and negative densities in the  
940 target difference map  $\Delta\rho(E)$  so that the electron densities at the ground state are skewed  
941 toward the intermediate state. Third, structure factors are calculated from the  
942 combined map. Finally, the phase set of the calculated structure factors is discarded,  
943 and the amplitudes are used to refine a single conformation of the intermediate species  
944  $E$  that  $\Delta\rho(E)$  represents.

945

946 This protocol following the SVD and Ren rotation of components achieves a  
947 refinement of a pure structural species without the need of alternative conformations.  
948 Several points are noteworthy. First, the minimization protocol in this refinement is  
949 performed against a numerically reconstituted amplitude set that has never been  
950 directly measured from a crystal. This reconstituted dataset could be considered as an  
951 extrapolated dataset “on steroids” if compared to the traditional extrapolation of small  
952 differences, such as, the Fourier coefficient set to calculate a 3Fo-2Fc map, a technique  
953 often used to overcome a partial occupancy of an intermediate structure. An  
954 extrapolation of small differences is not directly observed either but computed by an  
955 exaggeration of the observed difference based on an assumption that the intermediate  
956 state is partially occupied, such as the doubling of the observed difference in 3Fo-2Fc =  
957  $F_o + 2(F_o - F_c)$ . In contrast to the conventional technique of extrapolation, the  
958 deconvolution method applied here is an interpolation among many experimental

Ren: Isomerization sampling

959 datasets rather than an extrapolation. Secondly, the deconvolution is a simultaneous  
960 solution of multiple intermediate states mixed together instead of solving a single  
961 excited state.

962  
963 Second, a map calculated from the ground state structure is chosen as the base map  
964 instead of an experimental map such as  $F_o$  or  $2F_o-F_c$  map. If the second step of the  
965 protocol is skipped, that is, no difference map is combined with the ground state map,  
966 the refinement would result in an  $R$  factor of nearly zero, since the refinement is  
967 essentially against the calculated structure factors (bR in Table S2). This is to say, the  
968 residuals of the refinement are solely due to the difference component instead of the  
969 base map. This is desirable since errors in the static structure of the ground state are  
970 gauged during its own refinement. On the other hand, if an experimental map is  
971 chosen as a base map, the refinement  $R$  factors would reflect errors in both the base map  
972 and the difference map, which leads to a difficulty in an objective evaluation of this  
973 refinement protocol.

974  
975 Third, the combination of the base map and a difference map is intended to  
976 represent a pure intermediate species. Therefore, alternative conformations in  
977 structural refinement that model a mixture of species would defeat this purpose.  
978 However, this combined map could be very noisy and may not represent a single  
979 species without a proper rotation. This is particular the case, if the target difference  
980 map  $\Delta\rho$  is not derived from an SVD analysis and Ren rotation. The SVD analysis  
981 identifies many density components that are inconsistent among all observed difference  
982 maps and excludes them, which greatly reduces the noise content. Therefore, this  
983 refinement protocol may not be very successful without an SVD analysis. Another  
984 source of noise originates from the phase set of the structure factors. Prior to the  
985 refinement of the intermediate structure, the phase set remains identical to that of the  
986 ground state. This is far from the reality when an intermediate structure involves  
987 widespread changes, such as those refined in this study. If the rotation after SVD is not  
988 properly selected, the target difference map would remain as a mixture minus the  
989 ground state. Therefore, the refinement of a single conformation would encounter  
990 difficulty or significant residuals, as judged by the  $R$  factors, the residual map, and the  
991 refined structure. A proper solution to this problem is a better SVD solution by Ren  
992 rotation rather than alternative conformations. A successful refinement of near perfect



Ren: Isomerization sampling

993 *trans* or *cis* double bonds is a good sign to indicate that the reconstituted amplitude set  
994 after a rotation reflects a relatively homogeneous structure. If a double bond could not  
995 be refined well to near perfect *trans* or *cis* configuration, the dataset of structure factor  
996 amplitudes is likely from a mixture of heterogeneous configurations, which occurred  
997 frequently in previous studies of bR and photoactive yellow protein (Jung et al., 2013;  
998 Lanyi and Schobert, 2007; Nogly et al., 2018). It has been a great difficulty in  
999 crystallographic refinement in general that a heterogeneous mixture of conformations  
1000 cannot be unambiguously refined even with alternative conformations. This difficulty  
1001 becomes more severe when a mixture involves more than two conformations or when  
1002 some conformations are very minor.

1003  
1004 Lastly, the refinement protocol proposed here could be carried out in the original  
1005 unit cell and space group of the crystal at the ground state. However, this is not always  
1006 applicable as the original goal of the meta-analysis is a joint examination of all available  
1007 structures from a variety of crystal forms. It would be highly desirable to evaluate  
1008 difference maps of the same or similar proteins from non-isomorphous crystals together  
1009 by SVD. Alternatively, the refinement protocol could also be performed in the space  
1010 group of P1 with a virtual unit cell large enough to hold the structure, which is the  
1011 option in this study (Table S2). This is to say, the entire analysis of SVD-rotation-  
1012 refinement presented here could be extracted and isolated from the original crystal  
1013 lattices, which paves the way to future applications to structural data acquired by  
1014 experimental techniques beyond crystallography, most attractively, to single particle  
1015 reconstruction in cryo electron microscopy.

1016  
1017

Ren: Isomerization sampling

## 1018 Supplementary Tables

Table S1. Datasets analyzed in this work

| Publication                               | PDB   | Label     | Resolution | Main conclusions                                                                                                      | New findings in this work                                                                                                                                                                                                                                                                                                                                                                                                                                                                                 |
|-------------------------------------------|-------|-----------|------------|-----------------------------------------------------------------------------------------------------------------------|-----------------------------------------------------------------------------------------------------------------------------------------------------------------------------------------------------------------------------------------------------------------------------------------------------------------------------------------------------------------------------------------------------------------------------------------------------------------------------------------------------------|
| Nogly et al. Science 361, eaat0094, 2018  | 6g7h  | dark6     | 1.5 Å      | Retinal fully isomerizes by 10 ps. But the SB water dissociates earlier.                                              | The short-delay datasets contribute to the structures of $I' \rightarrow I \rightarrow J' \rightarrow J$ . Photoisomerization in $J'$ ; retinal binding pocket expansion before 1 ps in I and contraction at 10 ps in J                                                                                                                                                                                                                                                                                   |
|                                           | 6g7i  | 49-406fs  | 1.9 Å      |                                                                                                                       |                                                                                                                                                                                                                                                                                                                                                                                                                                                                                                           |
|                                           | 6g7j  | 457-646fs | 1.9 Å      |                                                                                                                       |                                                                                                                                                                                                                                                                                                                                                                                                                                                                                                           |
|                                           | 6g7k  | 10ps      | 1.9 Å      |                                                                                                                       |                                                                                                                                                                                                                                                                                                                                                                                                                                                                                                           |
| Kovacs et al. Nat. Commun. 10, 3177, 2019 | 6g7l  | 8.33ms    | 1.9 Å      | The exceedingly high power density of the pump laser causes two-photon absorption. Vibrational motions were observed. | The sub-ps datasets exhibit extensive vibrations at various frequencies. The vibrational signals are widespread over the entire bR molecule and not associated with any structural elements. Therefore, it is concluded that these global vibrations are intrinsic properties of bR induced by short laser pulses. The vibrational signals are more prominent under higher power density of the laser pulses. However, these vibrations are irrelevant to the light-driven proton pumping function of bR. |
|                                           | 6ga1  | dark1     | 1.7 Å      |                                                                                                                       |                                                                                                                                                                                                                                                                                                                                                                                                                                                                                                           |
|                                           | 6ga2  | dark2     | 1.8 Å      |                                                                                                                       |                                                                                                                                                                                                                                                                                                                                                                                                                                                                                                           |
|                                           | 6rmk  | dark3     | 1.8 Å      |                                                                                                                       |                                                                                                                                                                                                                                                                                                                                                                                                                                                                                                           |
|                                           | 6ga7  | 240fs     | 1.8 Å      |                                                                                                                       |                                                                                                                                                                                                                                                                                                                                                                                                                                                                                                           |
|                                           | 6ga8  | 330fs     | 1.8 Å      |                                                                                                                       |                                                                                                                                                                                                                                                                                                                                                                                                                                                                                                           |
|                                           | 6ga9  | 390fs     | 1.8 Å      |                                                                                                                       |                                                                                                                                                                                                                                                                                                                                                                                                                                                                                                           |
|                                           | 6gaa  | 430fs     | 1.8 Å      |                                                                                                                       |                                                                                                                                                                                                                                                                                                                                                                                                                                                                                                           |
|                                           | 6gab  | 460fs     | 1.8 Å      |                                                                                                                       |                                                                                                                                                                                                                                                                                                                                                                                                                                                                                                           |
|                                           | 6gac  | 490fs     | 1.8 Å      |                                                                                                                       |                                                                                                                                                                                                                                                                                                                                                                                                                                                                                                           |
|                                           | 6gad  | 530fs     | 1.8 Å      |                                                                                                                       |                                                                                                                                                                                                                                                                                                                                                                                                                                                                                                           |
|                                           | 6gae  | 560fs     | 1.8 Å      |                                                                                                                       |                                                                                                                                                                                                                                                                                                                                                                                                                                                                                                           |
|                                           | 6gaf  | 590fs     | 1.8 Å      |                                                                                                                       |                                                                                                                                                                                                                                                                                                                                                                                                                                                                                                           |
|                                           | 6gag  | 630fs     | 1.8 Å      |                                                                                                                       |                                                                                                                                                                                                                                                                                                                                                                                                                                                                                                           |
| 6gah                                      | 680fs | 1.8 Å     |            |                                                                                                                       |                                                                                                                                                                                                                                                                                                                                                                                                                                                                                                           |
| 6gai                                      | 740fs | 1.8 Å     |            |                                                                                                                       |                                                                                                                                                                                                                                                                                                                                                                                                                                                                                                           |
| 6ga4                                      | 1ps   | 1.8 Å     |            |                                                                                                                       |                                                                                                                                                                                                                                                                                                                                                                                                                                                                                                           |
| 6ga5                                      | 3ps   | 1.9 Å     |            |                                                                                                                       |                                                                                                                                                                                                                                                                                                                                                                                                                                                                                                           |
| 6ga6                                      | 10ps  | 1.8 Å     |            |                                                                                                                       |                                                                                                                                                                                                                                                                                                                                                                                                                                                                                                           |
| 6ga3                                      | 33ms  | 2.1 Å     |            |                                                                                                                       |                                                                                                                                                                                                                                                                                                                                                                                                                                                                                                           |

1019

1020

Ren: Isomerization sampling

| Intermediate                       | bR                                                                                                              | I'      | I         | J'       | J       |
|------------------------------------|-----------------------------------------------------------------------------------------------------------------|---------|-----------|----------|---------|
| Time period                        | 0-                                                                                                              | < 50 fs | 40-700 fs | 0.5-2 ps | 1-30 ps |
| <i>c</i> <sub>10</sub>             | 0                                                                                                               | 0       | 3,300     | 0        | -4,200  |
| Coefficient <i>c</i> <sub>14</sub> | 0                                                                                                               | 2,000   | 2,700     | 2,700    | 2,000   |
| <i>c</i> <sub>17</sub>             | 0                                                                                                               | 3,000   | 0         | -1,300   | -300    |
| Starting model                     | PDB 6g7h                                                                                                        |         |           |          |         |
| Resolution range                   | 50-2.1 Å                                                                                                        |         |           |          |         |
| Space group                        | P1                                                                                                              |         |           |          |         |
| Unit cell                          | $a = b = 62.32 \text{ \AA}; c = 111.10 \text{ \AA}; \alpha = \beta = 90^\circ; \text{ and } \gamma = 120^\circ$ |         |           |          |         |
| Unique reflections                 | 80,354 in working set + 4,236 in test set = 84,590 total                                                        |         |           |          |         |
| Completeness                       | 95% in working set + 5% in test set = 100% reconstituted                                                        |         |           |          |         |
| <i>R</i> (%)                       | 1.8                                                                                                             | 29.4    | 31.0      | 29.1     | 30.0    |
| <i>R</i> <sub>free</sub> (%)       | 1.9                                                                                                             | 31.1    | 32.4      | 30.4     | 30.7    |
| Refined content                    | 230 protein residues + retinal + water molecules                                                                |         |           |          |         |
| Number of atoms                    | 1,798                                                                                                           | 1,795   | 1,798     | 1,796    | 1,795   |
| Water molecules                    | 8                                                                                                               | 5       | 8         | 6        | 5       |
| RMSD bonds (Å)                     | 0.005                                                                                                           | 0.009   | 0.009     | 0.009    | 0.009   |
| RMSD angles (°)                    | 0.793                                                                                                           | 1.206   | 1.105     | 1.085    | 1.068   |
| Rama. favored (%)                  | 98.7                                                                                                            | 96.5    | 95.6      | 96.1     | 96.5    |
| Rama. outliers (%)                 | 0.0                                                                                                             | 0.0     | 0.4       | 0.4      | 0.4     |
| Clash score                        | 4                                                                                                               | 9       | 5         | 4        | 6       |

1021

1022

Ren: Isomerization sampling

1023 **Supplementary Figures and Legends**

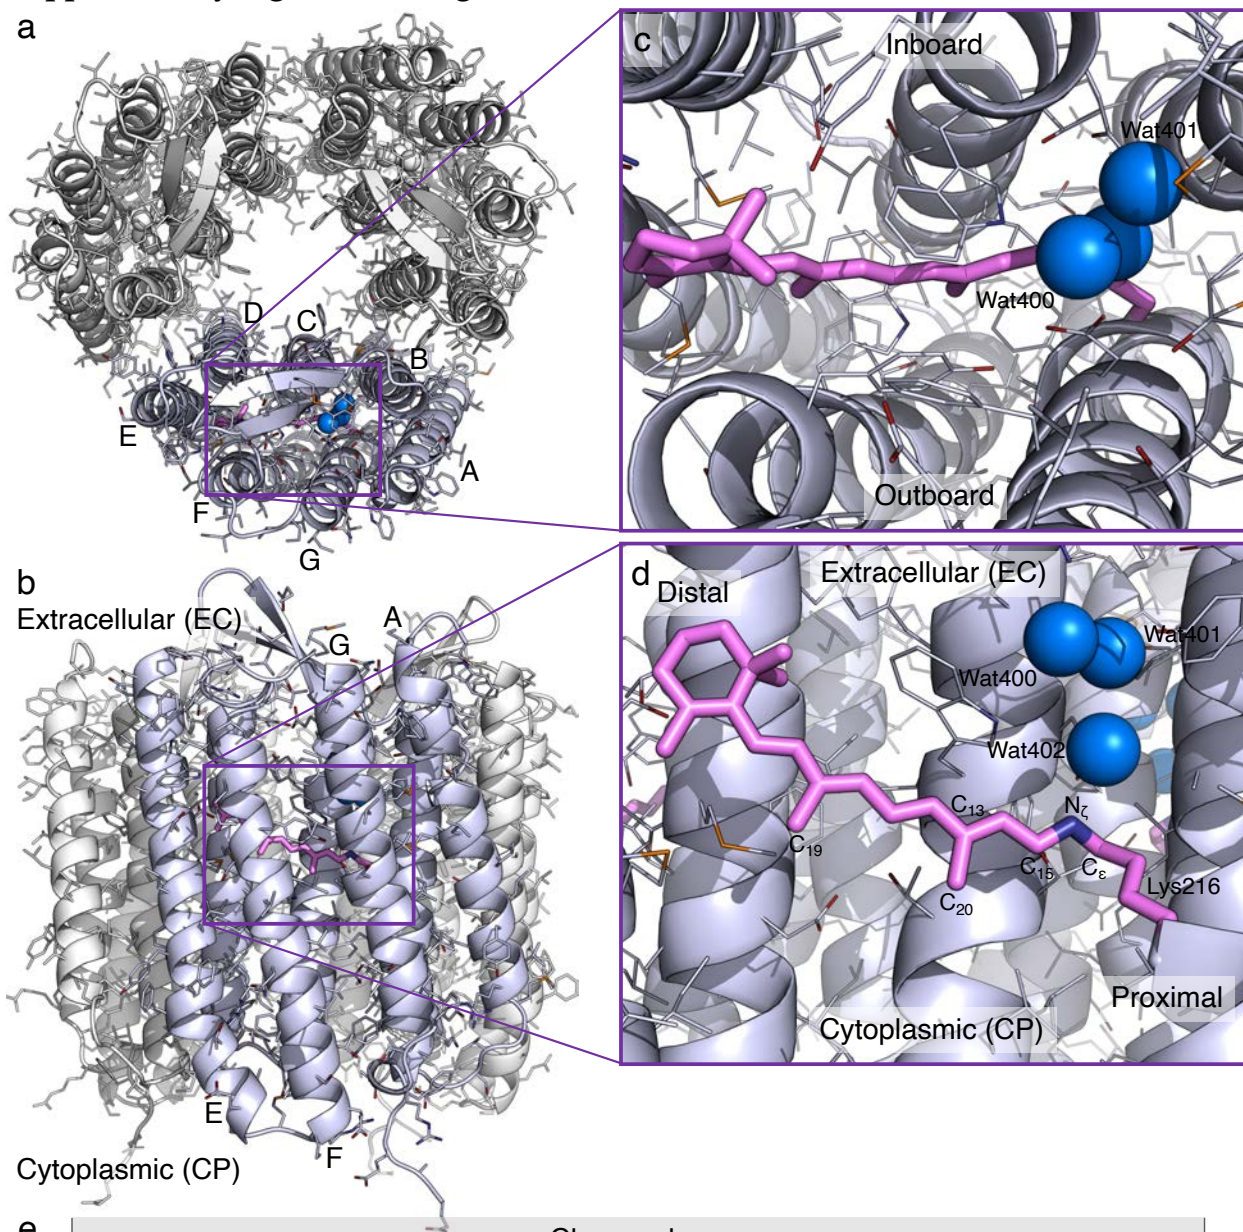

1024

Ren: Isomerization sampling

1025 Figure S1. Orientations in bacteriorhodopsin. (a) Bacteriorhodopsin (bR) trimer viewed  
1026 from the extracellular (EC) side along the three-fold axis. (b) An orthographical view to  
1027 (a) looking from the outside of the trimer. (c and d) Two orthographical views of the  
1028 retinal chromophore looking along the three-fold and normal to the three-fold axis. The  
1029 plane of retinal is largely parallel to the three-fold axis. Therefore, two sides of the  
1030 plane are called inboard and outboard with respect to the three-fold axis. The direction  
1031 toward the anchor Lys216 is called proximal. The  $\beta$ -ionone ring direction is therefore  
1032 distal. (e) Chemical structure of retinal incorporated to its anchor Lys216. The atom  
1033 numbers and various segment names are marked.  
1034



Ren: Isomerization sampling

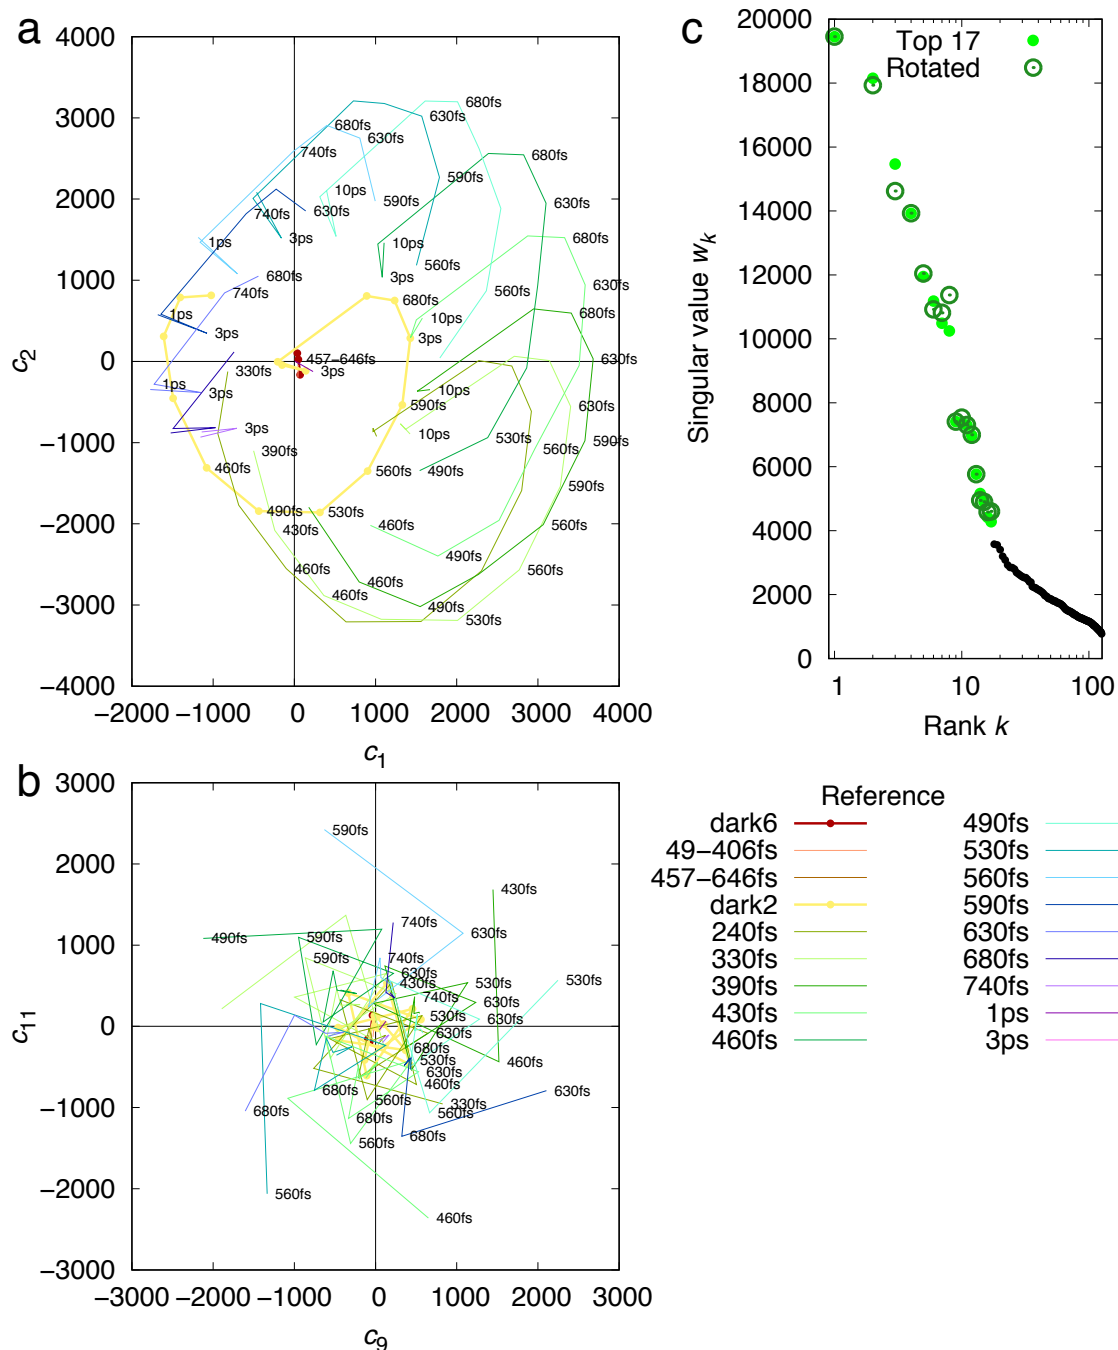

1035

1036

1037 Figure S2. SVD applied to difference Fourier maps. Difference Fourier maps at the  
 1038 short delays  $t \leq 10$  ps are decomposed into component maps. Each difference map at a  
 1039 time delay  $t$  can be represented by a linear combination of these components,  $c_1(t)\mathbf{U}_1 +$   
 1040  $c_2(t)\mathbf{U}_2 + \dots$ , where  $\mathbf{U}_k$  are the time-independent components and  $c_k(t)$  are their  
 1041 corresponding time-dependent coefficients (Methods). (a and b) Two example plots  
 1042 show circular correlations between  $c_1$  and  $c_2$ ,  $c_9$  and  $c_{11}$ . These circular correlations

### Ren: Isomerization sampling

1043 indicate two-dimensional oscillations. Each colored trace represents difference maps in  
1044 a time series calculated with a common reference. Those time series with a dark  
1045 reference are plotted with thick lines. Other series are in thin lines. (c) Singular values  
1046 before and after Ren rotation (Ren, 2016, 2019) (Methods). Singular values derived from  
1047 SVD indicate the significance of the components. 17 of them stand out.  
1048

### Ren: Isomerization sampling

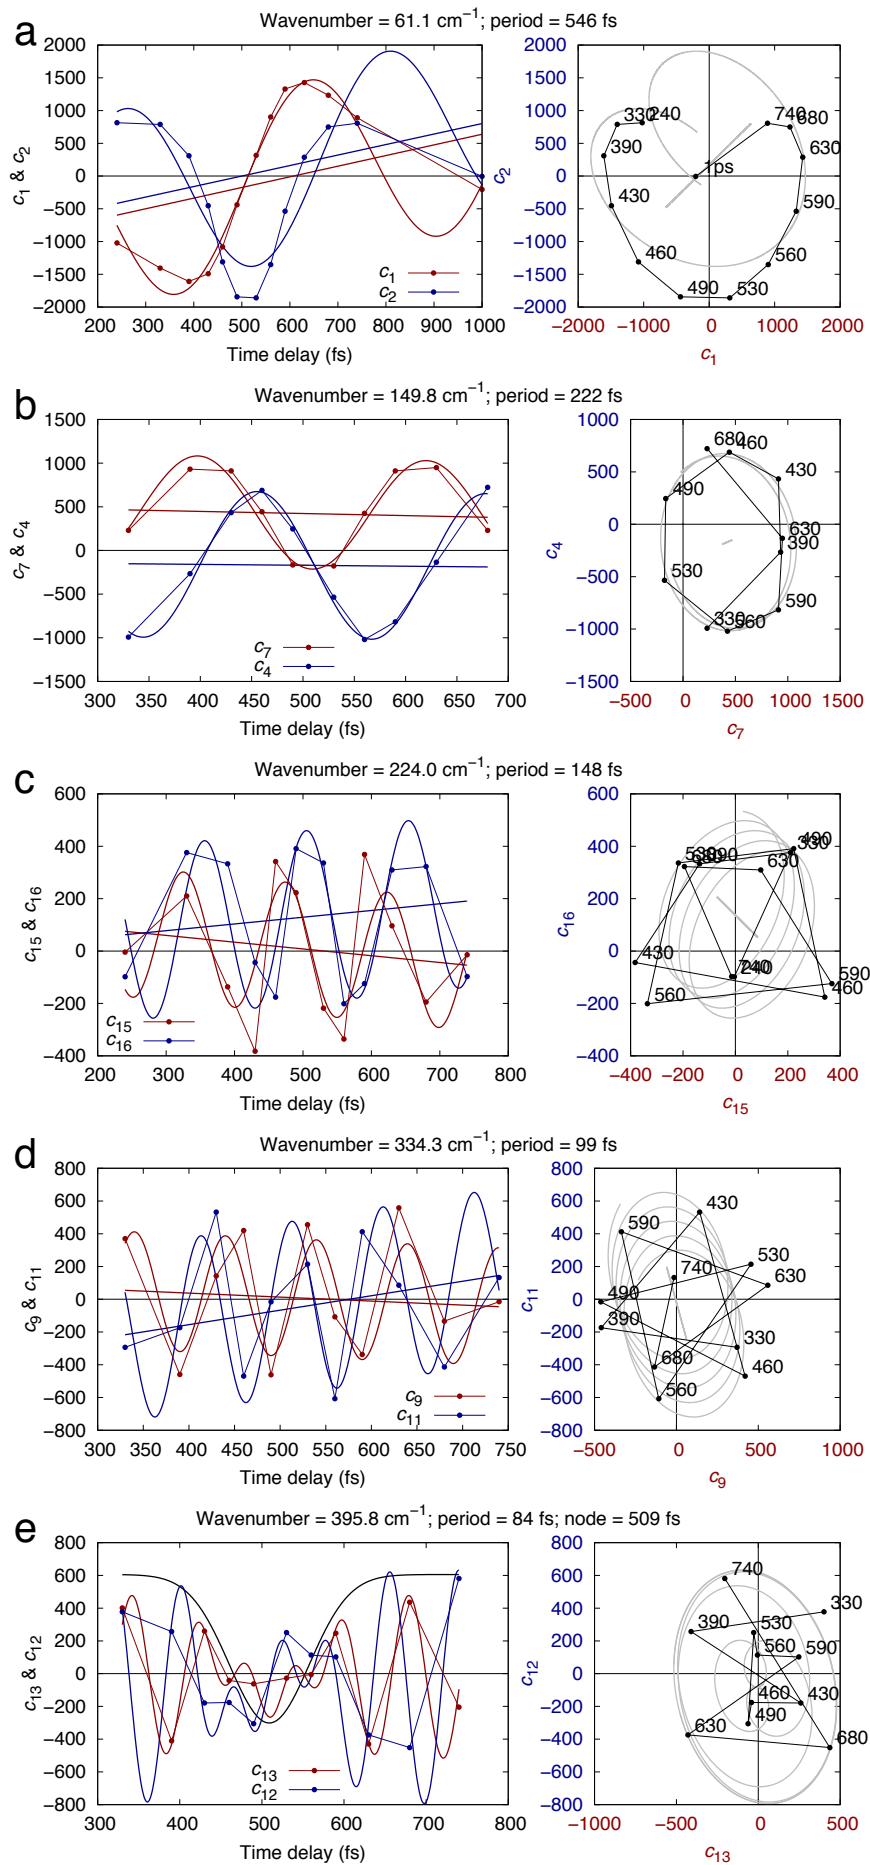

Ren: Isomerization sampling

1050 Figure S3. Oscillations of SVD components. The coefficients of ten components  $c_1, c_2, c_4,$   
1051  $c_7, c_{15}, c_{16}; c_9, c_{11};$  and  $c_{12}, c_{13}$  are found oscillating at frequencies ranging from 60 to 400  
1052  $\text{cm}^{-1}$ . Each pair of the coefficients oscillate at a common frequency. These frequencies  
1053 are  $61 \pm 2, 150 \pm 3, 224 \pm 7, 334 \pm 8,$  and  $396 \pm 3 \text{ cm}^{-1}$ , respectively. These coefficients are  
1054 plotted against the time delay  $t$  (left) and against each other in a pair (right). Each  
1055 coefficient is fitted with a sine function around a straight baseline  $c_k = a \sin\left(\frac{2\pi t}{T} + \varphi\right) +$   
1056  $b + ct$ . Both the fitted function and the baseline are plotted. The amplitude  $a$  for the  
1057 last pair of coefficients  $c_{12}$  and  $c_{13}$  are replaced with a Gaussian function  $a -$   
1058  $\exp\left(-\frac{(t-t_0)^2}{\tau^2}\right)$  to implement a node at  $t_0 = 509 \pm 5 \text{ fs}$  (e).  
1059  
1060

Ren: Isomerization sampling

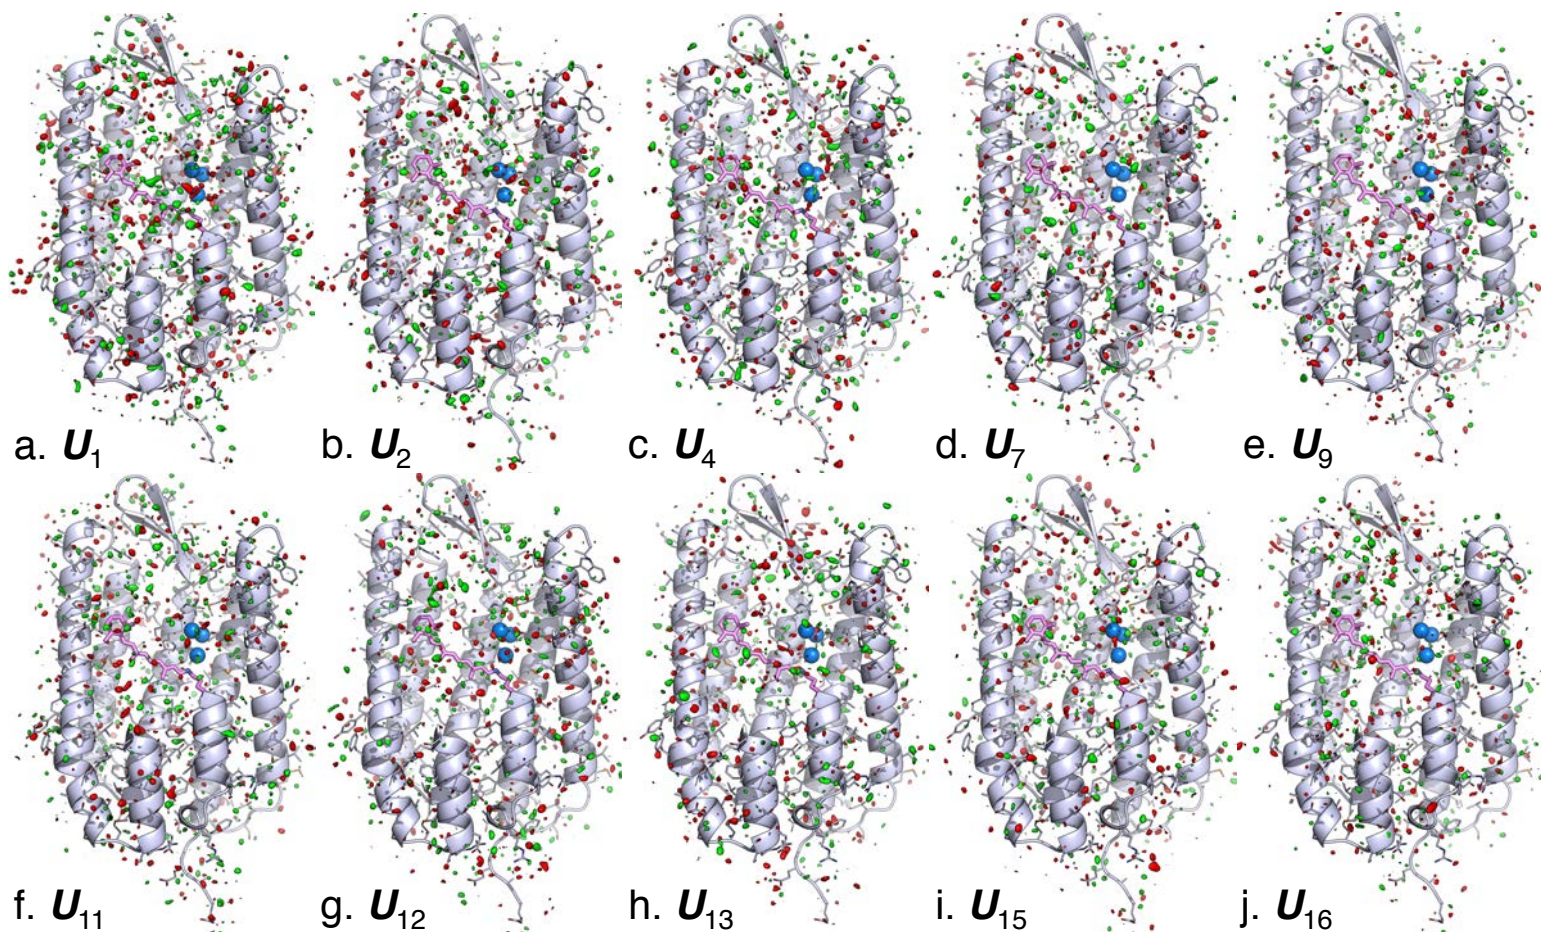

1062

1063 Figure S4. No structural signal in oscillating components. Ten oscillating components  
1064 are contoured at  $\pm 3\sigma$  in green and red, respectively. The main chain and side chains of  
1065 the protein are rendered with ribbon and sticks, respectively. The retinal and Lys216  
1066 are in purple sticks. Several key waters are in blue spheres. Parts of the structure are  
1067 omitted to reveal more of the interior. Despite that the time-dependent coefficients to  
1068 these components contain strong oscillatory signals (Figs. S2 and S3), these components  
1069 themselves display no obvious association with any structural features such as the  
1070 retinal or secondary structures. They are in stark contrast to the signal distributions of  
1071 the non-oscillating components (Figs. 1ab, 2b, and S5).

1072



Ren: Isomerization sampling

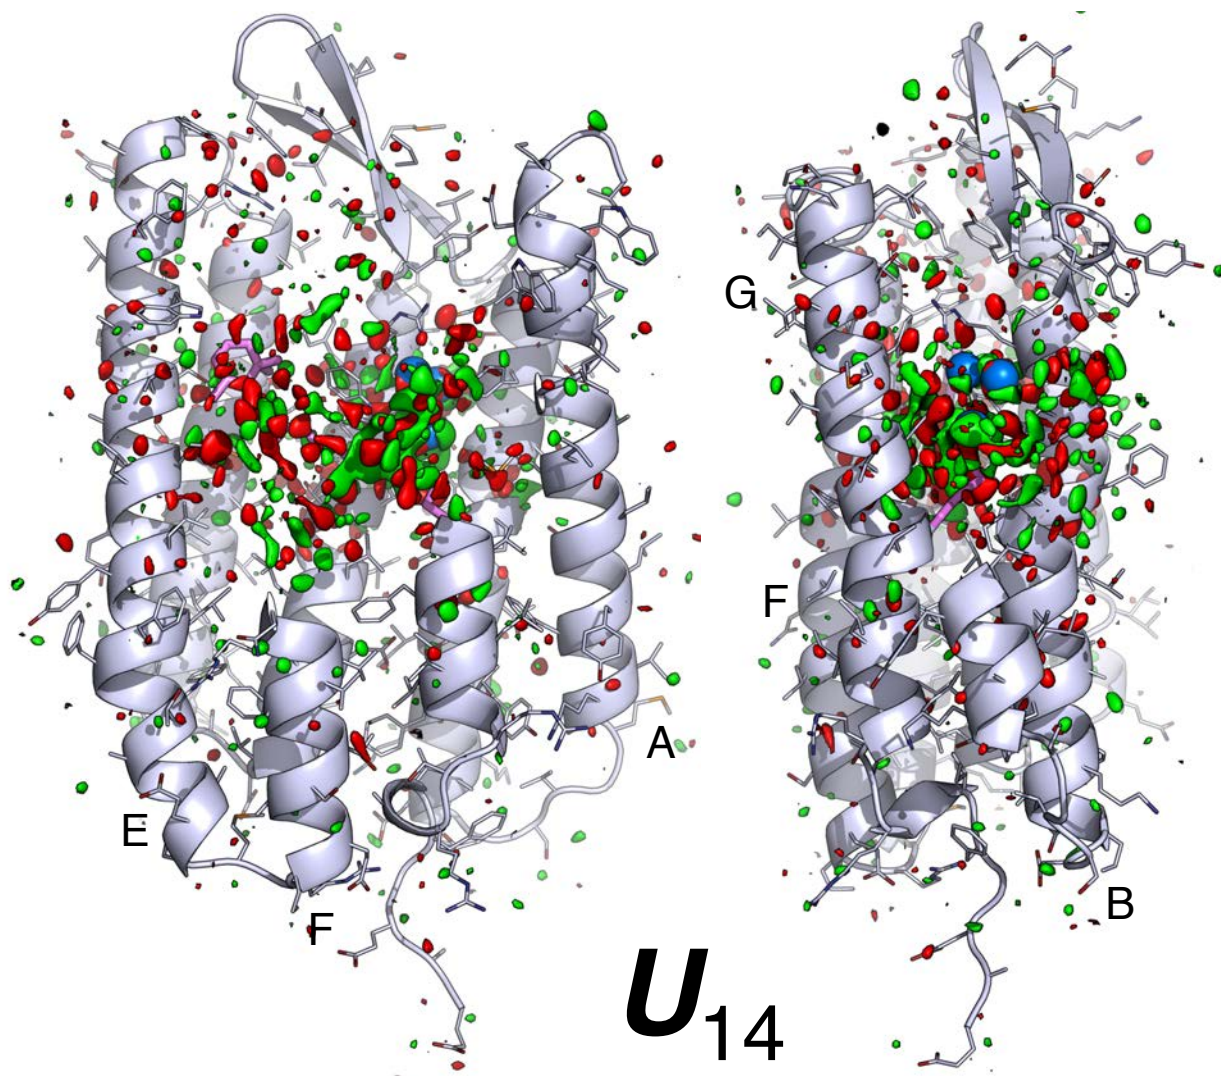

1073  
1074

1075 Figure S5. Two orthographical views of component map  $U_{14}$ . The main chain and side  
1076 chains of the protein are rendered with ribbons and sticks, respectively. The retinal and  
1077 Lys216 are in purple sticks. Several key waters are in blue spheres. Parts of the  
1078 structure are omitted to reveal more of the interior. The map is contoured at  $\pm 3\sigma$   
1079 in green and red, respectively. The signals are largely associated with the chromophore  
1080 and its immediate vicinity.

1081

Ren: Isomerization sampling

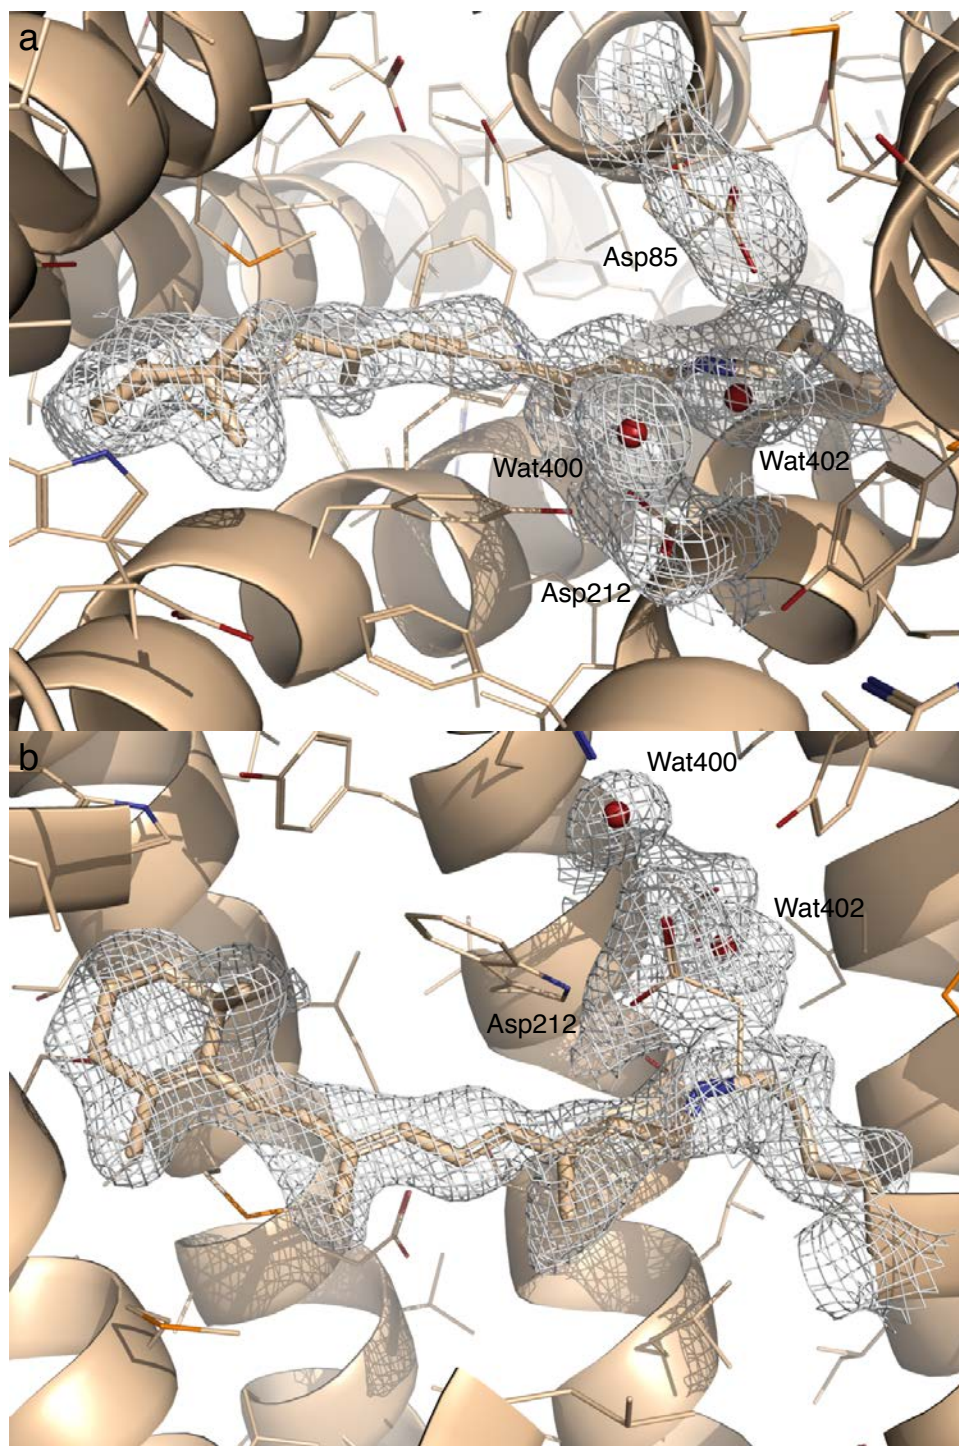

1082  
1083

1084 Figure S6. Two orthographical views of the 2Fo-Fc map of  $I'$  contoured at  $3.5\sigma$ . Here Fo  
1085 is the reconstituted structure factor amplitudes rather than observed amplitudes (Table  
1086 S2). Fc is the structure factor amplitudes calculated from the refine structure (Methods).

Ren: Isomerization sampling

1087 The same protocol applies to the Fourier synthesis of 2Fo-Fc maps of other  
1088 intermediates (Figs. S7, S9, and S10).

1089

1090



Ren: Isomerization sampling

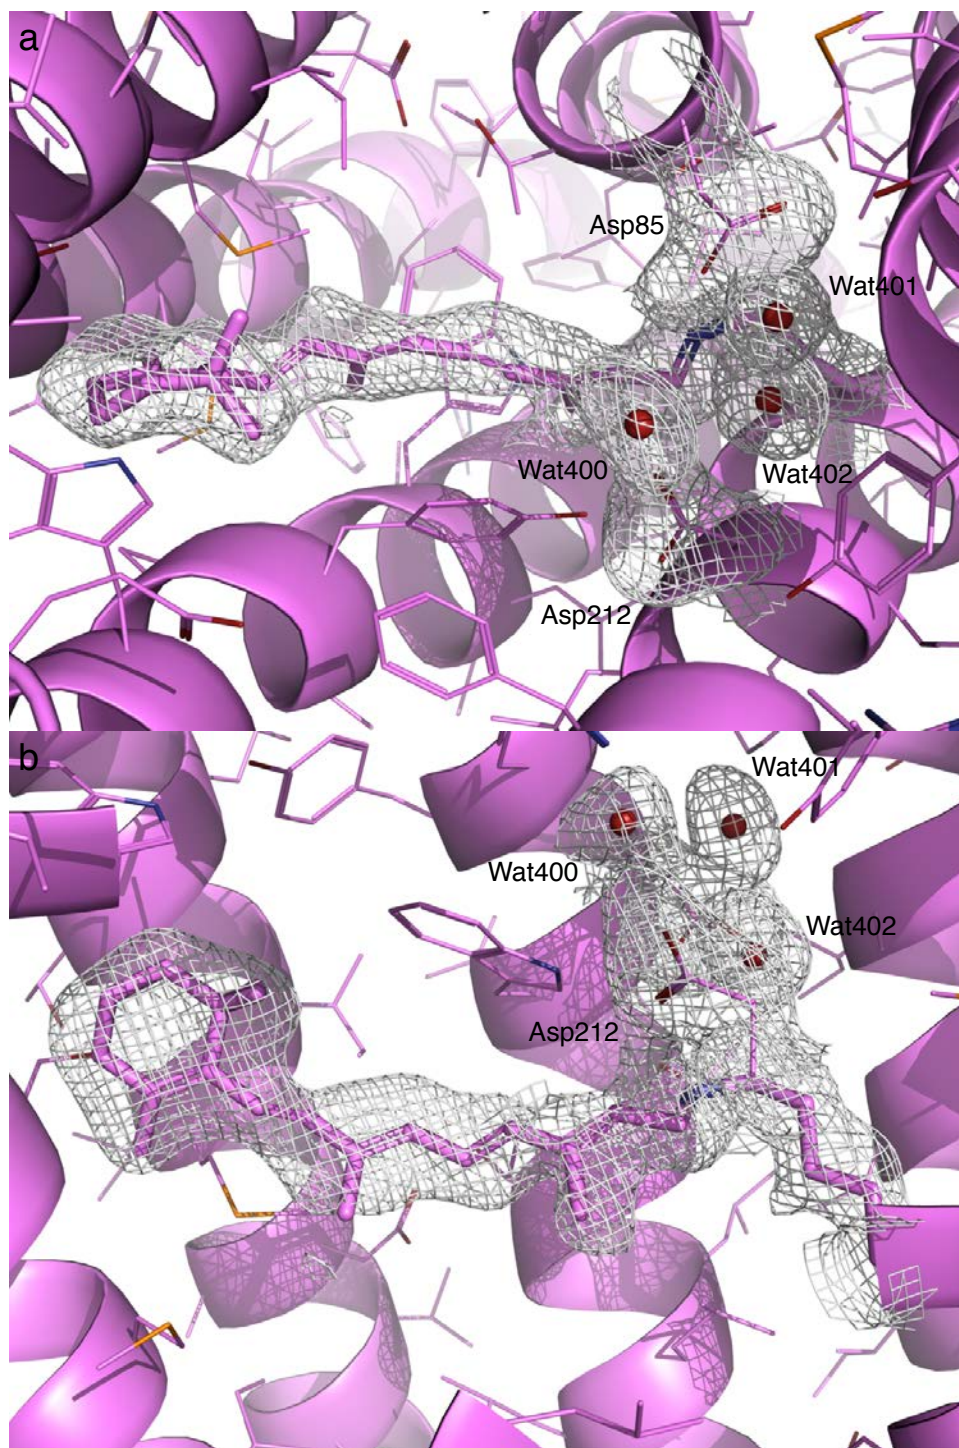

1091  
1092  
1093  
1094  
1095  
1096

Figure S7. Two orthographical views of the 2Fo-Fc map of I contoured at 3σ. Here Fo is the reconstituted structure factor amplitudes rather than observed amplitudes (Table S2). Fc is the structure factor amplitudes calculated from the refine structure (Methods).

Ren: Isomerization sampling

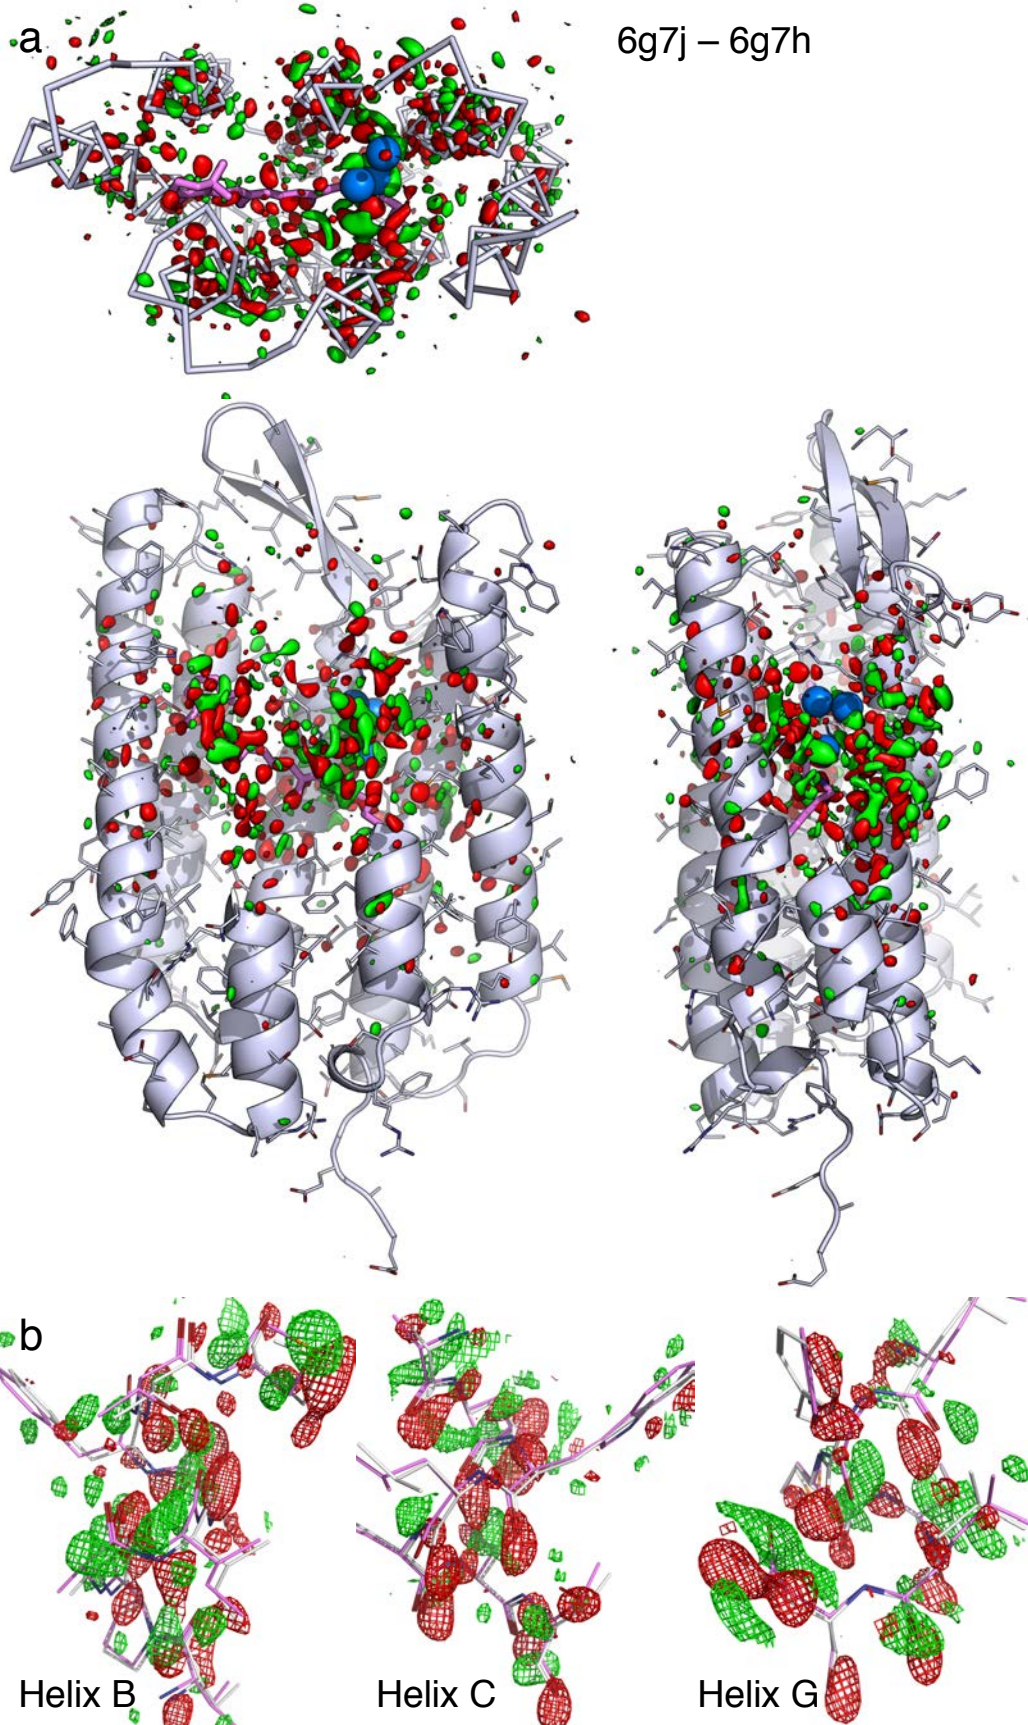



Ren: Isomerization sampling

1098 Figure S8. Raw difference Fourier map at 457-646 fs. This difference Fourier map is  
1099 calculated from the dataset 6g7j at the time point of 457-646 fs by subtracting the dark  
1100 dataset 6g7h. The map is contoured at  $\pm 3\sigma$  in green and red, respectively. This map is  
1101 prior to SVD analysis. Compared with  $\mathbf{U}_{10}$  (Fig. 2b) and the reconstituted map (Fig. 3a),  
1102 it is clear that this is the original source of the widespread signals except that the  $\sigma$   
1103 value of this map is higher than those after SVD. (a) The raw difference map contoured  
1104 in the entire molecule shows the association of the signals with the structural elements  
1105 at an excellent signal-to-noise ratio. (b) Details of the raw difference map show  
1106 displacements of helices. The raw difference map is largely the same as the  
1107 reconstituted map (Fig. 3a).  
1108  
1109

Ren: Isomerization sampling

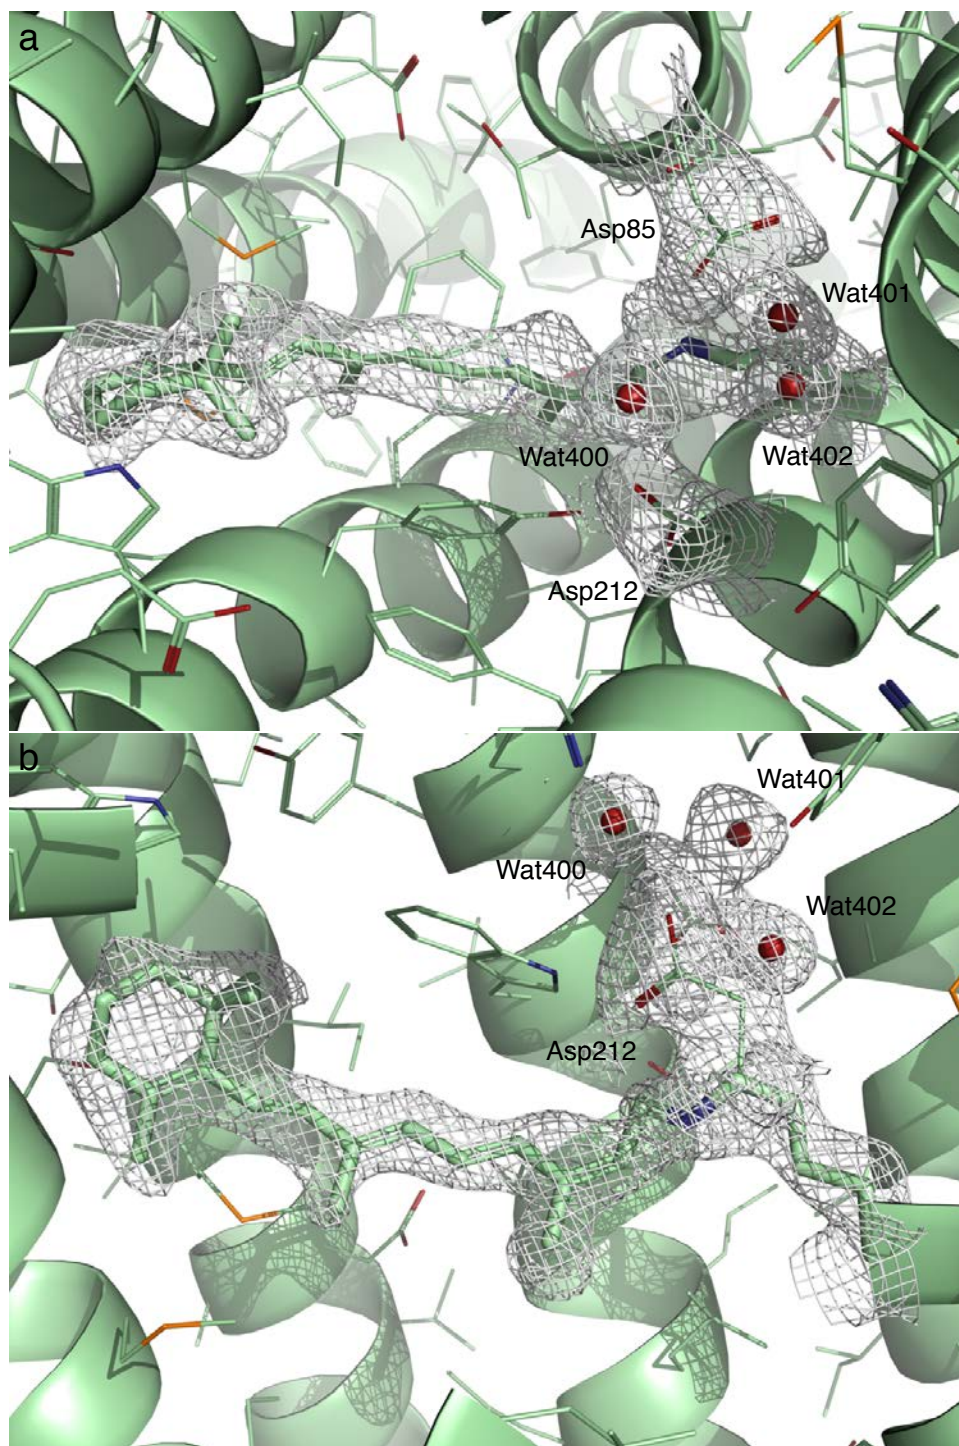

1110  
1111  
1112  
1113  
1114  
1115

Figure S9. Two orthographical views of the 2Fo-Fc map of J' contoured at 4σ. Here Fo is the reconstituted structure factor amplitudes rather than observed amplitudes (Table S2). Fc is the structure factor amplitudes calculated from the refine structure (Methods).

Ren: Isomerization sampling

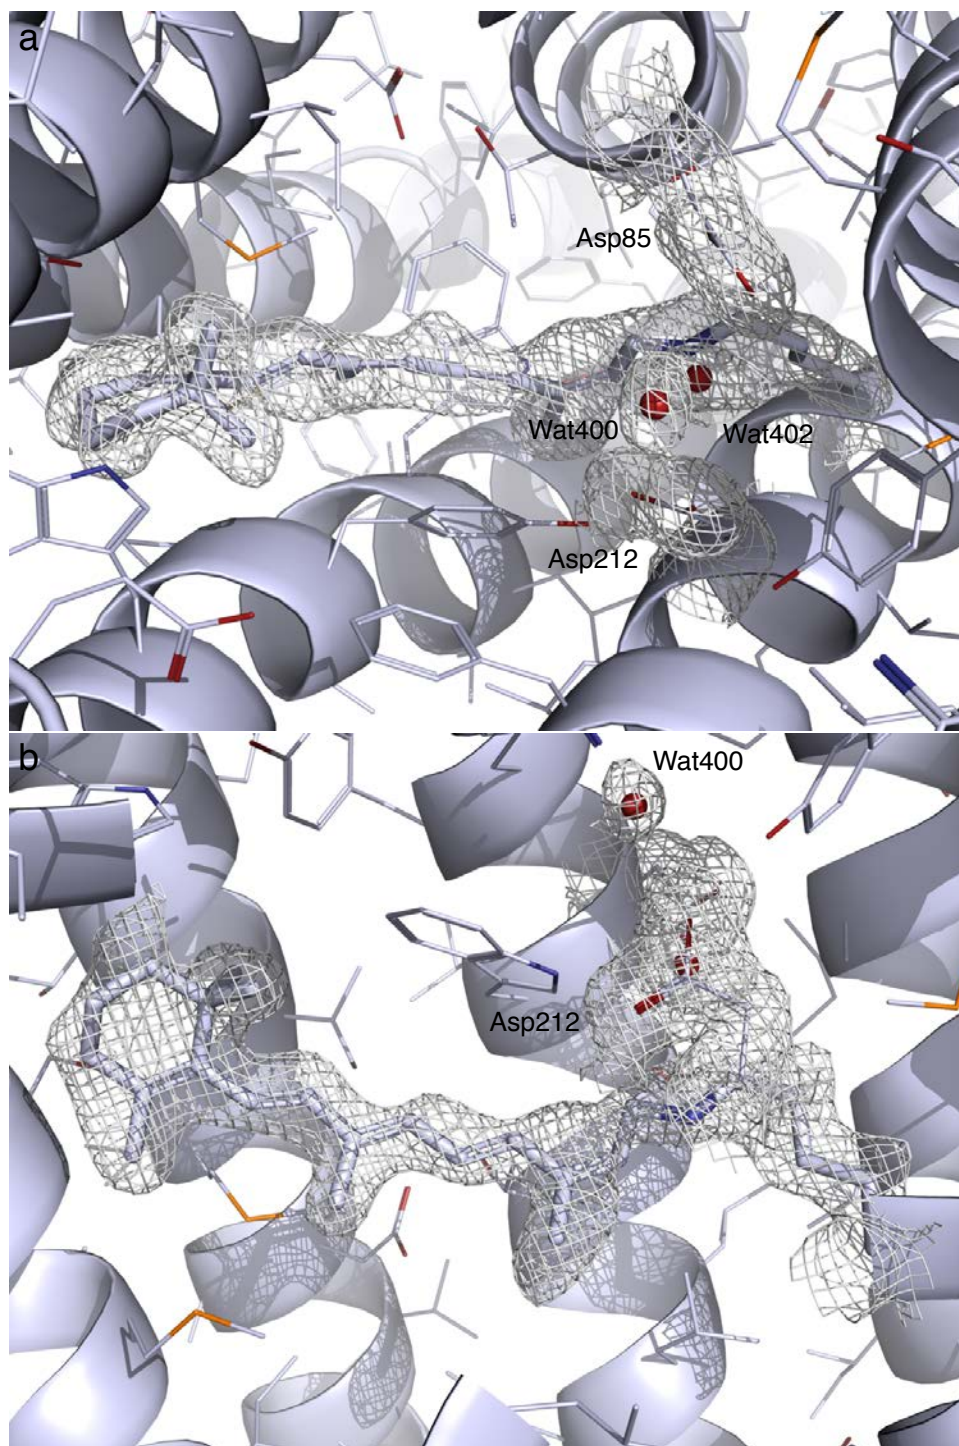

1116  
1117  
1118  
1119  
1120  
1121

Figure S10. Two orthographical views of the 2Fo-Fc map of J contoured at  $5\sigma$ . Here Fo is the reconstituted structure factor amplitudes rather than observed amplitudes (Table S2). Fc is the structure factor amplitudes calculated from the refine structure (Methods).
